# Supplementary material
Source: PubMed Central journal article supplement (PMC2909290)
Supplement: supp_fj.09-152835_09-152835SuppData.pdf [file supp_fj.09-152835_09-152835SuppData.pdf]

## Supplemental Information

Primer information for chromatin immunoprecipitation (ChIP)

For data in **Fig. 6A**, position of primers relative to the transcription start site of the gene and their sequences were listed as follow:

*Plagl1*, -2993 to -2873: forward 5' TGGCCTTGA ACTCCCTTG TAA  
reverse 5' TTTATCGGTCAGGCATGGTG  
-2093 to -1960: forward 5' TCCCAAACGGCATTCTTACAG  
reverse 5' TGA CTGACTTCCAATGTGGCA  
-974 to -872: forward 5' CGAAGGCAATA TAAACAGCGG  
reverse 5' TTTCGCCATCTCCTGAGTGAG  
254 to 380: forward 5' CAGCC AGAGATGCAGCAAAG  
reverse 5' TGTCGCCAGGTTGTAAAGACC

*Mdk*, -1973 to -1872: forward 5' TCATGCACCGTGACCAGAA  
reverse 5' ACGCAGCTTACCATGATCCAG  
141 to 29: forward 5' AGCTCTTGTCAGCGACAAGATT  
reverse 5' CGAGAGCCTTTTTCTAGTGCAG  
147 to 233: forward 5' TGTGACACCAGGACATACTCCC  
reverse 5' TACTTTTCCCTCTCGCAGCCT  
672 to 806: forward 5' GCTGAGACATCGGTTCCAAGT  
reverse 5' TCGCCTAGTCTCTTCTCCGCTA

*Peg3*, -2921 to -2839: forward 5' AAGACATTGAGAGGCACCACG  
reverse 5' TCTTTTCCCCCCTAGTCTGAGT  
-875 to -749: forward 5' TTCTACAAACTTCGGCAACGG  
reverse 5' TAACGGAGGTATCGCTGCCAT  
-145 to -63: forward 5' TGCCTTGACAACAGCAGTCTG  
reverse 5' ACCAATCCAAGACCCCATTC  
518 to 630: forward 5' CGCAGATGATGCAGAAGTCCT  
reverse 5' GCCCTTAGACTTTGCTGAGCA

For data in **Fig. 6B**, the sequences of primers used were listed as follow:

|              |                                                                       |
|--------------|-----------------------------------------------------------------------|
| <i>Plag1</i> | forward 5' CAGCC AGAGATGCAGCAAAAG<br>reverse 5' TGTCGCCAGGTTGTAAAGACC |
| <i>Mdk</i>   | forward 5' GCTGAGACATCGGTTCCAAGT<br>reverse 5' TCGCCTAGTCTCTTCTCCGCTA |
| <i>Peg3</i>  | forward 5' GATTTTGTACGCCTGCCCGTT<br>reverse 5' CAGTGGATAATGCCTTCCCA   |
| <i>Mest</i>  | forward 5' GCAGCCTGTCCATGAATGTGT<br>reverse 5' TCCTACGTGTGTTTTGAGCCC  |
| <i>Ezh2</i>  | forward 5' CTGTCCATGGCTTTCCTGAGA<br>reverse 5' AACCCAATCGCCATCGCTT    |
| <i>Gpc3</i>  | forward 5' CTGCGAGGAACTTTTGCG<br>reverse 5' AGAGTGGCAATAAGAGCCGGA     |
| <i>Meis1</i> | forward 5' CATCGATCGTGGCTCCTTTAA<br>reverse 5' AAATGCACAAAGCCCTAGCG   |
| <i>Igf2</i>  | forward 5' CAGCTGACCTCATTTCCTGAT<br>reverse 5' TATGCAAACCGAACAGCGG    |
| <i>Skp2</i>  | forward 5' AAACCTGCTCCCAGTCAATCG<br>reverse 5' TTCCACTCTGATTTCCGGACCA |
| <i>Bub1</i>  | forward 5' CACGTTTCGACATCACAAGTGC<br>reverse 5' CCTGACCGACACTTACCGAAA |

*Mmp14* forward 5' GCCTGCACCACAGAAAAGACA  
reverse 5' TCTGCTTAGTCGGCGAACTGA

*Fgf1* forward 5' CGAGCTGGATTTGGCTGTTT  
reverse 5' TGCTGCACCTCCTTTCAAAGT

*Klf9* forward 5' GCTCCGAGCAGTTTCCCTTTT  
reverse 5' TCCCATCACGTCACAATCCAG

*Pim3* forward 5' AAACGCCACGAAGAACGA  
reverse 5' GGCCGCATAAGCCAATGAA

*Gstm* forward 5' TGTGCAAAACAGAATCCCGG  
reverse 5' TCCCAATTAGGCACTCCCCTT

*Inmt* forward 5' TGGCAATGTGTGCAGATCCAG  
reverse 5' TTGGTGCCCAGTCCTATGTCA

*Coll0a1* forward 5' CTTGCTAGCCCCAAGACACAA  
reverse 5' CCATGCATCATTCCGCTGTAC

Chromosome19: 23.12Mb forward 5' TGGACTGCCAGAAAACAGAGC  
reverse 5' AGCCACGGTGGAAGACATTT

*Gapdh* forward 5' CATCTTCTTGTGCAGTGCCAG  
reverse 5' AGCATCCCTAGACCCGTACAGT

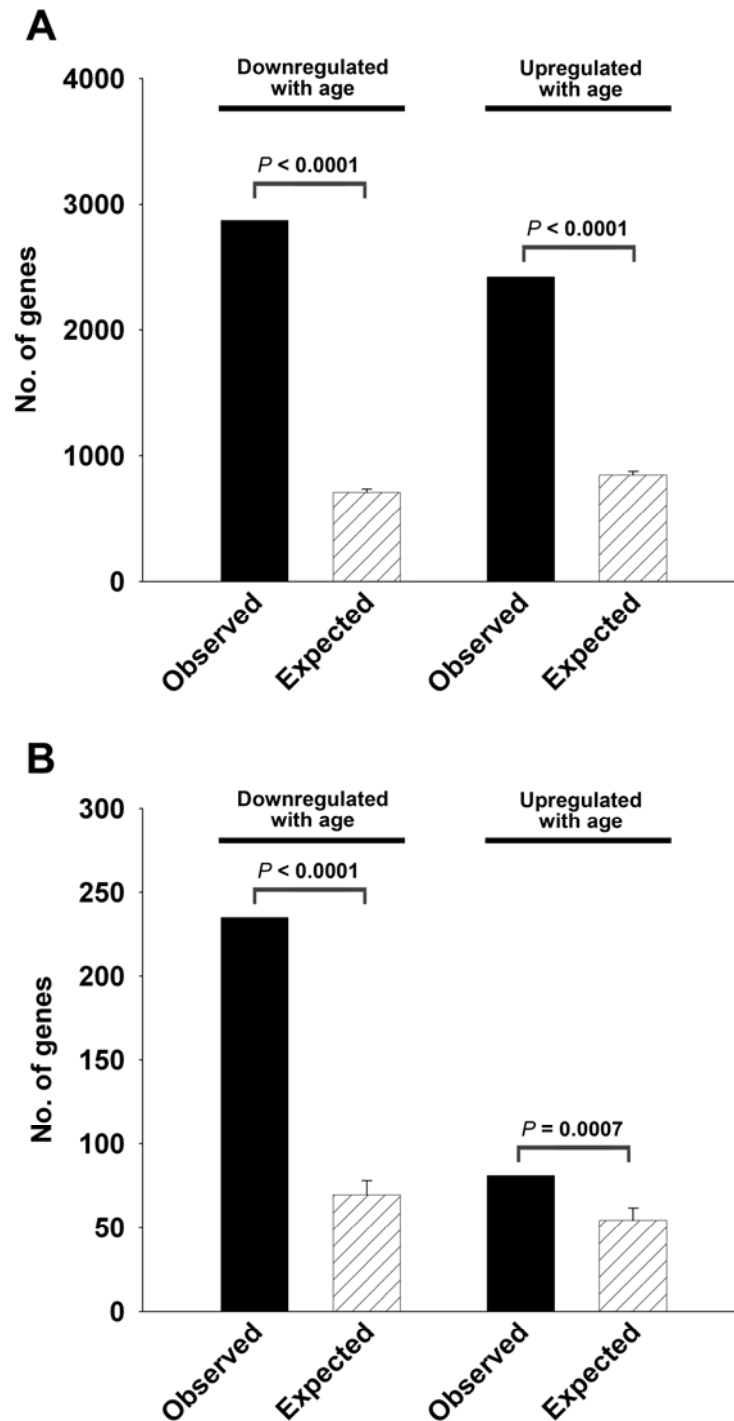

**Fig. S1. The number of genes commonly regulated with age in multiple organs of rats and mice.** (A) The number of genes up- or downregulated with age in both rat kidney and lung. The solid bars represent the observed number of genes commonly regulated (defined by  $P < 0.01$ ) in both kidney and lung with age. The hatched bars represent the number of commonly regulated genes that would be expected by chance (mean  $\pm$  SD). The observed overlap between organs was significantly greater than the overlap expected by chance (Pearson's Chi-square test). (B) The number of genes up- or downregulated with age in both rat and mouse, in all organs studied. Among genes that changed substantially in either the mouse ( $\geq 2.0$ -fold,  $P < 0.05$ , same direction in all 3 organs studied) or the rat ( $\geq 2.0$ -fold,  $P < 0.05$ , same direction in both organs studied), the observed overlap (defined by  $P < 0.05$ , same direction in all organs of both species, solid bars) was significantly greater than the overlap expected by chance (hatched bars, mean  $\pm$  SD).

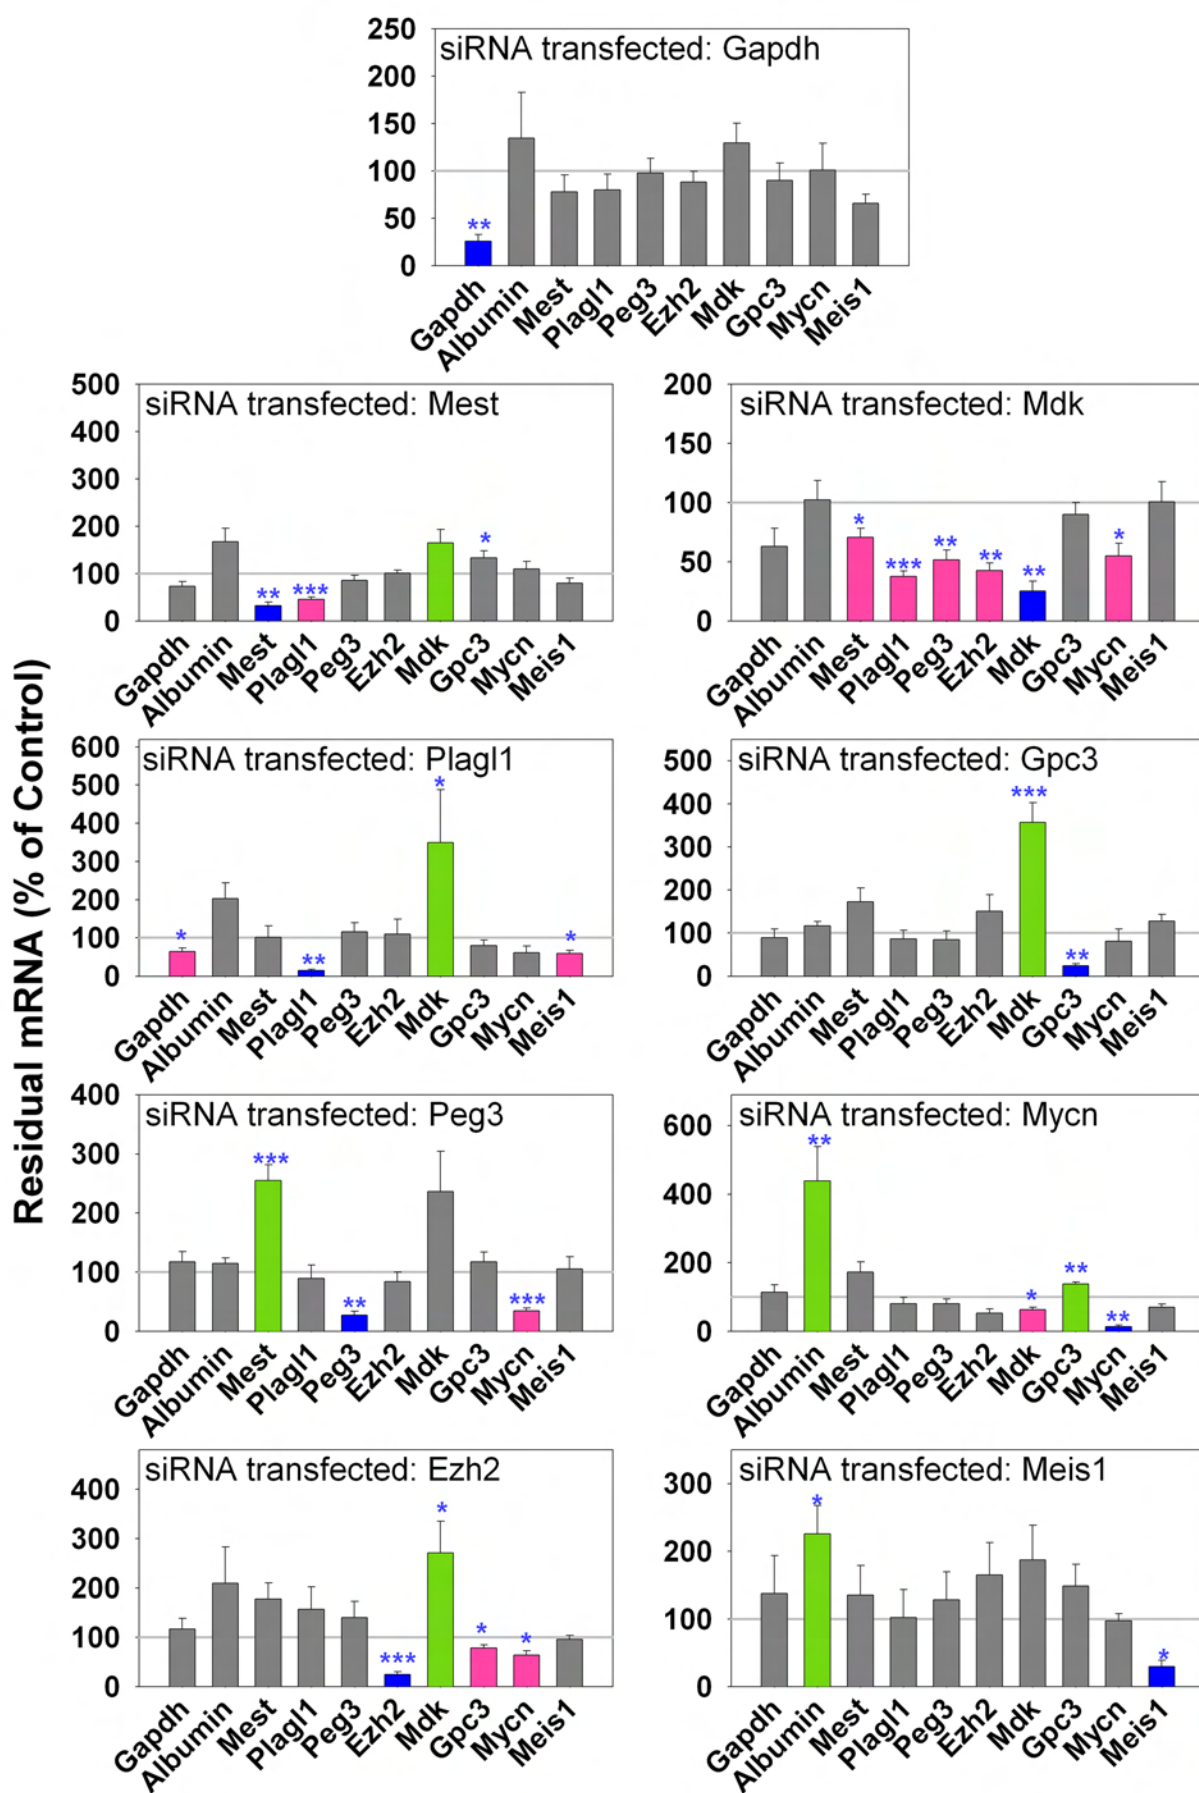

**Fig. S2. Changes in mRNA expression (mean  $\pm$  SEM) in primary hepatocytes transfected with siRNA.** Cultured murine hepatocytes isolated from fetal liver (E15) were used to evaluate the effect of target gene knockdown on expression of other genes. siRNA against Gapdh, Mest, Plagl1, Peg3, Ezh2, Mdk, Gpc3, Mycn, and Meis1 was used as indicated. All expression values were compared to hepatocytes transfected with control siRNA. Blue bars represent the target gene of the transfected siRNA. Significant changes are color coded (pink, downregulation; green, upregulation). All data were collected from transfection in hepatocytes from five different isolations. \*,  $P < 0.05$ ; \*\*,  $P < 0.01$ ; \*\*\*,  $P < 0.001$ .

**Table S1.** 316 genes that showed uniform up- or downregulation with age in all organs studied by microarray. Negative fold change indicates declining expression with age. A gene was included only if it was uniformly upregulated (81 genes) or downregulated (235 genes) with age (rat kidney and lung, 1 to 5 wk; mouse kidney and lung, 1 to 8 wk; mouse heart, 1 to 4 wk) at least 2.0 fold with  $P < 0.05$  in all organs studied in both species. ID numbers are for Affymetrix Mouse Genome 430 2.0 Array GeneChip or the Affymetrix Rat Genome 230 2.0 Array GeneChip.

| Gene Symbol in Mouse | Fold Change from 1 to 4 wk Mouse Heart | P value 1 vs 4 wk Mouse Heart | Fold Change from 1 to 4 wk Mouse Kidney | P value 1 vs 4 wk Mouse Kidney | Fold Change from 1 to 8 wk Mouse Kidney | P value 1 vs 8 wk Mouse Kidney | Fold Change from 1 to 4 wk Mouse Lung | P value 1 vs 4 wk Mouse Lung | Fold Change from 1 to 8 wk Mouse Lung | P value 1 vs 8 wk Mouse Lung | Fold Change from 1 to 5 wk Rat Lung | P value 1 vs 5 wk Rat Lung | Fold Change from 1 to 5 wk Rat Kidney | P value 1 vs 5 wk Rat Kidney |
|----------------------|----------------------------------------|-------------------------------|-----------------------------------------|--------------------------------|-----------------------------------------|--------------------------------|---------------------------------------|------------------------------|---------------------------------------|------------------------------|-------------------------------------|----------------------------|---------------------------------------|------------------------------|
| <i>2810433K01Rik</i> | -5.419                                 | 3.58E-02                      | -3.350                                  | 1.69E-02                       | -11.010                                 | 1.36E-04                       | -4.464                                | 6.72E-05                     | -3.583                                | 2.73E-04                     | -2.800                              | 2.888E-10                  | -2.494                                | 2.876E-09                    |
| <i>Abcb1a</i>        | 1.654                                  | 2.71E-03                      | 3.793                                   | 4.69E-08                       | 6.204                                   | 1.32E-09                       | 1.922                                 | 1.46E-07                     | 2.209                                 | 1.71E-08                     | 2.186                               | 1.503E-04                  | 2.496                                 | 2.172E-05                    |
| <i>Adams19</i>       | -5.997                                 | 3.71E-02                      | -4.120                                  | 2.08E-02                       | -3.732                                  | 2.93E-02                       | -3.591                                | 1.54E-02                     | -7.570                                | 7.65E-04                     | -6.922                              | 6.515E-19                  | -7.435                                | 2.804E-19                    |
| <i>Adhfe1</i>        | 2.050                                  | 5.97E-05                      | 2.350                                   | 2.68E-07                       | 2.510                                   | 1.19E-07                       | 2.338                                 | 3.17E-04                     | 2.795                                 | 5.92E-05                     | 1.176                               | 1.021E-03                  | 2.680                                 | 9.783E-18                    |
| <i>Adra1a</i>        | 4.347                                  | 7.53E-03                      | 1.794                                   | 3.14E-01                       | 4.132                                   | 2.54E-02                       | 1.985                                 | 1.16E-01                     | 4.241                                 | 3.86E-03                     | 1.139                               | 2.925E-02                  | 1.301                                 | 9.139E-05                    |
| <i>Afap1l2</i>       | -2.393                                 | 1.42E-04                      | -2.772                                  | 1.90E-05                       | -2.927                                  | 1.14E-05                       | -3.452                                | 6.80E-10                     | -2.786                                | 6.03E-09                     | -1.176                              | 1.067E-02                  | -1.721                                | 2.101E-09                    |
| <i>Agtrl1</i>        | -2.176                                 | 1.07E-03                      | -4.653                                  | 3.71E-07                       | -5.617                                  | 1.05E-07                       | -2.035                                | 2.54E-08                     | -2.032                                | 2.59E-08                     | -1.405                              | 3.551E-05                  | -2.223                                | 1.521E-11                    |
| <i>Aldh18a1</i>      | -2.130                                 | 3.99E-05                      | -4.035                                  | 6.10E-08                       | -4.436                                  | 2.92E-08                       | -2.082                                | 1.09E-06                     | -2.150                                | 6.88E-07                     | -1.448                              | 1.190E-10                  | -1.967                                | 2.731E-16                    |
| <i>Anln</i>          | -3.224                                 | 5.09E-05                      | -3.321                                  | 1.32E-07                       | -5.707                                  | 1.98E-09                       | -3.241                                | 2.24E-07                     | -3.141                                | 3.01E-07                     | -2.419                              | 9.876E-16                  | -1.951                                | 4.567E-13                    |
| <i>Ar</i>            | 2.812                                  | 5.42E-05                      | 5.918                                   | 3.48E-09                       | 5.813                                   | 3.90E-09                       | 2.280                                 | 7.79E-07                     | 3.326                                 | 1.22E-08                     | 1.574                               | 9.880E-10                  | 2.745                                 | 3.548E-17                    |
| <i>Arhgap11a</i>     | -2.410                                 | 2.72E-03                      | -1.960                                  | 1.30E-03                       | -3.392                                  | 6.60E-06                       | -1.977                                | 1.09E-03                     | -2.615                                | 6.07E-05                     | -1.998                              | 2.232E-08                  | -2.279                                | 8.780E-10                    |
| <i>Arhgap28</i>      | -2.277                                 | 1.03E-05                      | -2.595                                  | 1.24E-06                       | -2.657                                  | 9.59E-07                       | -2.902                                | 9.84E-09                     | -2.308                                | 1.47E-07                     | -1.899                              | 4.074E-08                  | -2.300                                | 3.060E-10                    |
| <i>Armxc2</i>        | -3.804                                 | 1.57E-06                      | -4.227                                  | 2.67E-07                       | -5.110                                  | 6.88E-08                       | -2.753                                | 1.65E-10                     | -2.582                                | 3.53E-10                     | -2.437                              | 2.612E-20                  | -5.587                                | 4.535E-27                    |
| <i>Armxc6</i>        | -3.349                                 | 1.70E-02                      | -3.647                                  | 2.27E-03                       | -3.435                                  | 3.15E-03                       | -4.953                                | 1.75E-02                     | -3.909                                | 3.71E-02                     | -1.512                              | 2.882E-12                  | -1.635                                | 7.075E-14                    |
| <i>Aspm</i>          | -3.634                                 | 2.94E-03                      | -1.570                                  | 2.09E-01                       | -2.633                                  | 1.47E-02                       | -2.486                                | 3.12E-02                     | -3.487                                | 5.81E-03                     | -2.267                              | 9.313E-12                  | -2.426                                | 1.749E-12                    |
| <i>Atp7a</i>         | -1.436                                 | 2.64E-02                      | -1.440                                  | 2.22E-05                       | -1.399                                  | 4.88E-05                       | -1.229                                | 1.14E-04                     | -1.251                                | 5.36E-05                     | -2.518                              | 2.095E-02                  | -2.377                                | 2.937E-02                    |
| <i>Aurka</i>         | -3.795                                 | 7.82E-04                      | -1.541                                  | 1.56E-02                       | -2.358                                  | 1.19E-04                       | -1.997                                | 1.67E-06                     | -2.332                                | 1.92E-07                     | -1.489                              | 2.840E-06                  | -1.474                                | 4.144E-06                    |
| <i>B2m</i>           | 1.475                                  | 9.15E-04                      | 1.146                                   | 5.75E-02                       | 1.362                                   | 4.65E-04                       | 1.708                                 | 6.76E-07                     | 1.760                                 | 3.74E-07                     | 2.802                               | 9.377E-16                  | 4.236                                 | 4.149E-19                    |
| <i>B4gal2</i>        | -2.007                                 | 2.73E-03                      | -3.667                                  | 3.03E-04                       | -3.924                                  | 1.97E-04                       | -1.786                                | 2.64E-04                     | -2.333                                | 7.78E-06                     | -1.633                              | 3.329E-13                  | -1.952                                | 3.429E-16                    |
| <i>Bcl6b</i>         | -1.578                                 | 1.26E-02                      | -3.266                                  | 1.05E-05                       | -4.011                                  | 2.07E-06                       | -2.581                                | 2.12E-04                     | -2.257                                | 7.44E-04                     | -2.061                              | 4.924E-06                  | -2.205                                | 1.290E-06                    |
| <i>Birc5</i>         | -3.223                                 | 5.90E-04                      | -3.187                                  | 3.24E-06                       | -46.155                                 | 4.39E-12                       | -3.047                                | 4.03E-08                     | -3.214                                | 2.39E-08                     | -2.197                              | 4.345E-12                  | -1.914                                | 2.215E-10                    |
| <i>Brca1</i>         | -2.111                                 | 4.21E-05                      | -3.057                                  | 3.03E-02                       | -16.399                                 | 4.99E-05                       | -2.486                                | 2.72E-06                     | -3.523                                | 8.44E-08                     | -1.947                              | 8.211E-12                  | -2.077                                | 1.175E-12                    |
| <i>Bub1</i>          | -5.625                                 | 2.87E-02                      | -8.578                                  | 2.32E-04                       | -37.395                                 | 1.54E-06                       | -3.794                                | 5.23E-06                     | -3.011                                | 3.39E-05                     | -2.185                              | 1.406E-08                  | -3.073                                | 1.209E-11                    |
| <i>Bub1b</i>         | -6.287                                 | 2.81E-04                      | -10.223                                 | 2.06E-08                       | -11.851                                 | 1.02E-08                       | -4.632                                | 1.54E-03                     | -4.749                                | 1.37E-03                     | -2.516                              | 1.159E-09                  | -2.996                                | 3.745E-11                    |
| <i>C4b</i>           | 1.547                                  | 9.72E-03                      | 1.319                                   | 4.64E-02                       | 1.458                                   | 1.05E-02                       | 2.727                                 | 2.84E-10                     | 3.674                                 | 1.35E-11                     | 5.149                               | 2.119E-13                  | 5.092                                 | 2.459E-13                    |
| <i>Cacna1g</i>       | -2.071                                 | 2.27E-03                      | -10.654                                 | 5.78E-08                       | -14.432                                 | 1.49E-08                       | -7.847                                | 2.02E-05                     | -10.812                               | 4.80E-06                     | -1.251                              | 3.524E-04                  | -1.933                                | 7.992E-12                    |
| <i>Cacnb3</i>        | -3.003                                 | 1.69E-02                      | -1.989                                  | 2.25E-04                       | -2.480                                  | 1.77E-05                       | -2.398                                | 6.44E-07                     | -2.664                                | 1.89E-07                     | -2.190                              | 1.142E-11                  | -3.608                                | 2.454E-16                    |
| <i>Capn6</i>         | -12.118                                | 1.15E-05                      | -1.832                                  | 2.97E-04                       | -2.155                                  | 3.56E-05                       | -8.257                                | 2.73E-05                     | -11.259                               | 7.11E-06                     | -1.561                              | 6.265E-05                  | -3.918                                | 1.370E-13                    |
| <i>Cbx7</i>          | 2.409                                  | 2.93E-04                      | 1.930                                   | 7.08E-06                       | 2.152                                   | 1.47E-06                       | 2.848                                 | 1.81E-08                     | 3.811                                 | 1.10E-09                     | 2.571                               | 3.442E-17                  | 2.057                                 | 1.487E-14                    |
| <i>Ccdc99</i>        | -3.514                                 | 1.01E-02                      | -4.110                                  | 8.08E-04                       | -10.355                                 | 8.96E-06                       | -4.121                                | 6.10E-03                     | -6.435                                | 9.18E-04                     | -1.612                              | 1.031E-05                  | -1.405                                | 5.967E-04                    |
| <i>Ccl5</i>          | 4.770                                  | 1.62E-02                      | 3.701                                   | 5.53E-03                       | 5.525                                   | 8.54E-04                       | 2.163                                 | 1.50E-03                     | 2.331                                 | 7.45E-04                     | 3.444                               | 1.447E-09                  | 2.073                                 | 9.778E-06                    |
| <i>Ccl6</i>          | 2.604                                  | 1.16E-04                      | 2.146                                   | 3.19E-03                       | 2.088                                   | 4.07E-03                       | 2.600                                 | 2.67E-08                     | 2.228                                 | 1.89E-07                     | 2.595                               | 4.099E-11                  | 3.543                                 | 1.048E-13                    |
| <i>Ccna2</i>         | -2.182                                 | 2.50E-03                      | -2.459                                  | 9.69E-09                       | -3.486                                  | 2.23E-10                       | -2.938                                | 6.27E-07                     | -3.220                                | 2.60E-07                     | -2.828                              | 3.555E-12                  | -2.726                                | 7.549E-12                    |

|                  |        |          |         |          |         |          |         |          |         |          |        |           |        |           |
|------------------|--------|----------|---------|----------|---------|----------|---------|----------|---------|----------|--------|-----------|--------|-----------|
| <i>Ccnb1</i>     | -4.180 | 2.99E-04 | -5.028  | 7.60E-03 | -19.666 | 7.18E-05 | -7.274  | 2.02E-03 | -8.369  | 1.23E-03 | -2.194 | 1.004E-09 | -1.720 | 7.074E-07 |
| <i>Ccnb2</i>     | -2.881 | 9.54E-06 | -3.403  | 8.81E-04 | -11.634 | 1.40E-06 | -2.687  | 4.86E-07 | -2.804  | 3.07E-07 | -2.572 | 3.756E-10 | -2.440 | 1.150E-09 |
| <i>Ccnd2</i>     | -2.112 | 3.11E-05 | -4.639  | 4.15E-10 | -4.948  | 2.58E-10 | -1.612  | 3.68E-07 | -1.539  | 1.10E-06 | -2.522 | 9.632E-06 | -2.472 | 1.303E-05 |
| <i>Ccnf</i>      | -2.832 | 5.47E-03 | -3.404  | 2.63E-04 | -4.961  | 2.31E-05 | -2.877  | 3.87E-03 | -2.487  | 9.61E-03 | -1.230 | 1.165E-03 | -1.237 | 9.148E-04 |
| <i>Cd276</i>     | -3.262 | 1.77E-03 | -6.703  | 6.85E-03 | -14.427 | 6.42E-04 | -1.913  | 1.43E-03 | -2.428  | 1.11E-04 | -1.496 | 1.867E-10 | -2.812 | 1.881E-19 |
| <i>Cd302</i>     | 1.266  | 1.76E-02 | 2.581   | 2.83E-07 | 3.101   | 4.01E-08 | 1.485   | 1.85E-06 | 1.552   | 6.09E-07 | 2.432  | 2.982E-11 | 5.711  | 1.153E-17 |
| <i>Cd74</i>      | 4.584  | 2.65E-07 | 3.510   | 3.86E-07 | 6.018   | 7.28E-09 | 2.172   | 1.06E-07 | 2.643   | 8.52E-09 | 2.201  | 3.013E-08 | 5.880  | 1.908E-15 |
| <i>Cdc20</i>     | -3.874 | 1.12E-04 | -2.683  | 1.81E-05 | -6.122  | 2.94E-08 | -2.554  | 6.60E-06 | -3.059  | 1.07E-06 | -1.746 | 1.387E-08 | -1.634 | 1.264E-07 |
| <i>Cdc2a</i>     | -3.434 | 5.45E-05 | -2.682  | 2.04E-04 | -8.523  | 8.50E-08 | -3.145  | 3.30E-07 | -4.468  | 1.72E-08 | -2.424 | 1.316E-10 | -2.637 | 2.084E-11 |
| <i>Cdca2</i>     | -3.622 | 1.27E-02 | -2.041  | 5.91E-02 | -5.907  | 2.25E-04 | -2.917  | 4.12E-07 | -2.915  | 4.14E-07 | -1.921 | 3.482E-07 | -1.739 | 4.469E-06 |
| <i>Cdca3</i>     | -3.553 | 9.69E-05 | -1.963  | 5.16E-04 | -3.543  | 1.38E-06 | -2.545  | 1.26E-05 | -3.008  | 2.37E-06 | -2.456 | 4.245E-11 | -1.887 | 3.226E-08 |
| <i>Cdca7</i>     | -4.984 | 9.92E-03 | -20.648 | 2.27E-05 | -29.685 | 7.44E-06 | -3.997  | 9.00E-08 | -3.382  | 3.66E-07 | -2.186 | 5.075E-12 | -3.195 | 9.157E-16 |
| <i>Cdca8</i>     | -3.884 | 1.55E-05 | -2.550  | 3.74E-05 | -5.174  | 1.12E-07 | -3.049  | 1.44E-06 | -2.911  | 2.25E-06 | -2.092 | 5.835E-11 | -1.884 | 1.204E-09 |
| <i>Cdh11</i>     | -3.375 | 1.32E-05 | -13.658 | 4.93E-13 | -11.160 | 1.28E-12 | -3.779  | 2.17E-12 | -4.308  | 7.11E-13 | -4.027 | 3.257E-21 | -5.760 | 1.482E-23 |
| <i>Cdk4</i>      | -2.044 | 2.15E-04 | -2.539  | 2.82E-09 | -2.684  | 1.45E-09 | -2.364  | 2.88E-09 | -2.315  | 3.81E-09 | -1.597 | 1.596E-15 | -2.217 | 7.770E-21 |
| <i>Cdk5rap2</i>  | -2.547 | 2.81E-02 | -1.821  | 3.94E-02 | -3.786  | 2.47E-04 | -3.214  | 4.95E-04 | -2.235  | 6.91E-03 | -1.331 | 4.717E-09 | -1.331 | 4.721E-09 |
| <i>Cdkn1c</i>    | -1.396 | 1.78E-02 | -15.084 | 2.48E-13 | -18.496 | 1.05E-13 | -1.166  | 4.78E-03 | -1.757  | 2.66E-08 | -2.358 | 1.679E-12 | -8.524 | 1.647E-21 |
| <i>Cdt1/Ris2</i> | -2.039 | 1.10E-04 | -2.138  | 3.95E-08 | -2.888  | 8.86E-10 | -2.339  | 1.71E-08 | -2.442  | 9.73E-09 | -2.016 | 5.468E-09 | -3.015 | 5.899E-13 |
| <i>Cenpe</i>     | -4.012 | 9.59E-04 | -1.623  | 6.19E-02 | -2.473  | 2.32E-03 | -2.629  | 4.10E-04 | -4.179  | 1.16E-05 | -2.413 | 2.451E-13 | -1.940 | 9.481E-11 |
| <i>Cenpi</i>     | -2.807 | 1.42E-02 | -4.111  | 4.67E-04 | -4.766  | 2.03E-04 | -6.039  | 3.60E-07 | -7.483  | 1.05E-07 | -2.092 | 1.090E-09 | -1.620 | 1.754E-06 |
| <i>Cenpk</i>     | -2.921 | 2.46E-03 | -1.986  | 5.60E-05 | -2.886  | 7.20E-07 | -2.899  | 5.60E-07 | -3.527  | 8.88E-08 | -2.438 | 5.660E-10 | -2.203 | 5.645E-09 |
| <i>Cenpn</i>     | -2.667 | 2.15E-04 | -1.547  | 6.00E-04 | -2.002  | 9.04E-06 | -1.927  | 2.35E-02 | -2.569  | 2.85E-03 | -1.845 | 1.017E-08 | -1.378 | 1.640E-04 |
| <i>Centa2</i>    | 2.223  | 1.06E-03 | 1.989   | 4.84E-03 | 2.125   | 2.64E-03 | 2.357   | 4.24E-06 | 2.139   | 1.41E-05 | 2.073  | 4.175E-10 | 3.837  | 9.244E-16 |
| <i>Chek1</i>     | -2.105 | 5.79E-03 | -2.270  | 3.45E-02 | -6.588  | 1.40E-04 | -2.137  | 4.05E-05 | -2.903  | 1.37E-06 | -1.846 | 9.420E-11 | -2.470 | 2.544E-14 |
| <i>Cirbp</i>     | -1.954 | 5.81E-04 | -2.804  | 1.77E-05 | -2.595  | 3.76E-05 | -2.407  | 3.31E-06 | -2.714  | 8.69E-07 | -2.565 | 4.401E-09 | -3.874 | 3.145E-12 |
| <i>Ckap4</i>     | -2.071 | 1.54E-08 | -5.230  | 8.25E-09 | -5.825  | 4.02E-09 | -3.000  | 3.93E-11 | -3.466  | 9.22E-12 | -2.385 | 1.853E-11 | -2.606 | 2.467E-12 |
| <i>Cks1b</i>     | -3.410 | 4.39E-07 | -5.986  | 1.15E-07 | -9.682  | 7.97E-09 | -3.552  | 9.44E-09 | -3.900  | 4.21E-09 | -2.310 | 2.459E-13 | -2.480 | 4.156E-14 |
| <i>Clec7a</i>    | 1.956  | 3.70E-04 | 1.358   | 1.72E-03 | 1.551   | 9.14E-05 | 1.473   | 8.25E-05 | 1.642   | 7.80E-06 | 2.153  | 6.226E-12 | 2.187  | 4.061E-12 |
| <i>Clip3</i>     | -1.691 | 1.04E-02 | -2.616  | 8.37E-07 | -2.961  | 2.28E-07 | -2.581  | 1.56E-06 | -2.765  | 7.43E-07 | -3.008 | 6.483E-18 | -3.310 | 9.466E-19 |
| <i>Cmah</i>      | 3.507  | 6.40E-03 | 1.626   | 7.65E-02 | 2.916   | 1.09E-03 | 2.182   | 6.80E-05 | 2.191   | 6.47E-05 | 2.057  | 3.263E-09 | 4.088  | 2.871E-15 |
| <i>Cmb1</i>      | 1.464  | 3.06E-03 | 2.118   | 1.09E-07 | 2.429   | 1.67E-08 | 1.636   | 6.74E-05 | 1.755   | 1.90E-05 | 2.495  | 6.720E-11 | 2.500  | 6.440E-11 |
| <i>Col1a1</i>    | -3.453 | 4.62E-07 | -5.475  | 8.25E-07 | -12.505 | 1.05E-08 | -2.517  | 8.20E-06 | -3.566  | 2.89E-07 | -1.271 | 8.927E-04 | -3.680 | 9.023E-17 |
| <i>Col1a2</i>    | -2.277 | 3.91E-06 | -4.490  | 7.58E-12 | -6.358  | 6.43E-13 | -1.472  | 1.18E-05 | -2.130  | 8.78E-09 | -1.257 | 3.744E-04 | -3.489 | 1.071E-17 |
| <i>Col24a1</i>   | -5.296 | 3.96E-03 | -4.773  | 9.13E-03 | -5.403  | 5.78E-03 | -7.626  | 3.47E-05 | -12.257 | 4.39E-06 | -2.041 | 9.156E-09 | -9.716 | 1.368E-19 |
| <i>Col5a1</i>    | -2.270 | 8.33E-06 | -4.038  | 2.89E-12 | -4.854  | 6.67E-13 | -2.766  | 5.32E-08 | -3.585  | 4.09E-09 | -2.255 | 2.083E-17 | -2.358 | 6.102E-18 |
| <i>Col5a2</i>    | -2.699 | 7.48E-06 | -2.699  | 2.77E-10 | -3.027  | 7.75E-11 | -1.986  | 2.17E-10 | -2.555  | 5.52E-12 | -1.405 | 2.123E-07 | -4.683 | 2.322E-21 |
| <i>Cpeb1</i>     | 2.320  | 2.08E-04 | 2.209   | 1.27E-04 | 2.838   | 9.48E-06 | 2.883   | 5.73E-05 | 2.352   | 3.72E-04 | 1.124  | 4.716E-02 | 1.928  | 2.025E-11 |
| <i>Gpxm1</i>     | -1.741 | 4.22E-03 | -2.716  | 6.31E-06 | -2.908  | 3.22E-06 | -1.805  | 3.76E-06 | -1.800  | 3.95E-06 | -3.752 | 2.860E-16 | -4.614 | 1.039E-17 |
| <i>Crebl2</i>    | 2.941  | 1.29E-04 | 2.473   | 1.93E-09 | 2.472   | 1.94E-09 | 2.859   | 7.36E-09 | 3.159   | 2.61E-09 | 2.484  | 5.520E-16 | 2.464  | 6.769E-16 |
| <i>Crispld2</i>  | 2.550  | 1.30E-04 | 2.478   | 3.65E-02 | 2.695   | 2.45E-02 | 7.338   | 9.09E-11 | 7.119   | 1.09E-10 | 2.450  | 2.915E-16 | 1.193  | 7.490E-04 |
| <i>Cry1</i>      | -1.242 | 2.02E-02 | -1.491  | 1.80E-02 | -4.363  | 3.19E-07 | -1.332  | 1.75E-02 | -1.806  | 1.03E-04 | -2.033 | 5.598E-10 | -2.411 | 7.271E-12 |
| <i>Cspg2</i>     | -2.133 | 5.17E-04 | -4.586  | 4.08E-07 | -5.284  | 1.55E-07 | -12.577 | 5.58E-12 | -16.561 | 1.65E-12 | -5.883 | 3.217E-18 | -6.782 | 5.399E-19 |
| <i>Csrp1</i>     | -2.290 | 5.74E-04 | -4.251  | 1.17E-06 | -4.138  | 1.42E-06 | -1.986  | 1.78E-07 | -2.061  | 1.00E-07 | -1.116 | 1.492E-02 | -1.965 | 2.027E-14 |

|                      |        |          |        |          |         |          |         |          |         |          |         |           |         |           |
|----------------------|--------|----------|--------|----------|---------|----------|---------|----------|---------|----------|---------|-----------|---------|-----------|
| <i>Cthrc1</i>        | -6.871 | 2.01E-08 | -2.143 | 2.09E-03 | -2.927  | 1.36E-04 | -2.083  | 5.69E-06 | -2.071  | 6.18E-06 | -3.947  | 2.212E-16 | -9.120  | 3.647E-21 |
| <i>Ctss</i>          | 1.557  | 2.99E-04 | 1.093  | 4.93E-01 | 1.517   | 6.23E-03 | 1.386   | 4.09E-04 | 1.517   | 4.82E-05 | 2.197   | 1.351E-12 | 3.612   | 2.595E-17 |
| <i>Cxcl9</i>         | 9.594  | 3.33E-04 | 4.162  | 1.23E-06 | 9.287   | 9.07E-09 | 1.395   | 4.88E-01 | 4.627   | 6.39E-03 | 2.004   | 1.073E-06 | 1.796   | 1.329E-05 |
| <i>Cybb</i>          | 1.566  | 5.86E-04 | 1.255  | 7.19E-02 | 1.580   | 1.83E-03 | 1.258   | 1.94E-02 | 1.302   | 9.24E-03 | 2.510   | 1.302E-04 | 3.107   | 9.012E-06 |
| <i>Cyp1a1</i>        | 2.239  | 3.04E-02 | 1.885  | 3.47E-04 | 2.025   | 1.39E-04 | 8.715   | 1.25E-08 | 10.217  | 5.57E-09 | 49.623  | 1.411E-15 | 4.397   | 3.692E-07 |
| <i>Cyp2e1</i>        | 2.017  | 3.64E-03 | 8.206  | 6.09E-09 | 10.282  | 1.90E-09 | 2.237   | 3.56E-02 | 3.146   | 5.59E-03 | 4.385   | 3.013E-09 | 1.507   | 1.857E-02 |
| <i>Cyp4b1</i>        | 2.010  | 1.61E-04 | 15.391 | 2.96E-11 | 13.787  | 4.79E-11 | 3.358   | 1.23E-12 | 3.848   | 3.48E-13 | 2.455   | 1.307E-11 | 1.248   | 6.960E-03 |
| <i>D10Ert610e</i>    | -1.448 | 8.39E-04 | -3.096 | 4.10E-09 | -3.831  | 5.62E-10 | -1.533  | 7.66E-07 | -1.827  | 1.76E-08 | -2.195  | 2.128E-16 | -3.195  | 2.601E-20 |
| <i>Dact1</i>         | -1.957 | 1.23E-05 | -2.846 | 9.12E-07 | -2.803  | 1.07E-06 | -1.323  | 3.11E-03 | -1.645  | 2.73E-05 | -2.156  | 6.361E-12 | -3.180  | 8.575E-16 |
| <i>Dbn1</i>          | -2.236 | 2.00E-06 | -2.651 | 5.50E-07 | -2.860  | 2.45E-07 | -3.967  | 1.21E-10 | -4.272  | 6.54E-11 | -3.615  | 1.973E-21 | -5.284  | 4.398E-24 |
| <i>Dbp</i>           | 4.293  | 6.49E-06 | 10.137 | 7.79E-09 | 8.272   | 2.20E-08 | 9.311   | 2.82E-09 | 4.356   | 2.97E-07 | 3.047   | 3.959E-13 | 2.926   | 8.756E-13 |
| <i>Dedd2</i>         | 2.494  | 5.15E-03 | 2.142  | 6.04E-04 | 2.151   | 5.77E-04 | 2.881   | 7.02E-06 | 3.836   | 5.82E-07 | 1.411   | 7.005E-08 | 1.402   | 9.629E-08 |
| <i>Dennd2a</i>       | -2.757 | 4.93E-02 | -5.570 | 8.50E-05 | -8.332  | 1.15E-05 | -2.993  | 1.02E-08 | -3.281  | 4.10E-09 | -1.720  | 1.988E-11 | -2.092  | 2.738E-14 |
| <i>Depdc1a</i>       | -4.455 | 1.53E-05 | -3.609 | 3.41E-04 | -4.498  | 8.61E-05 | -6.000  | 2.63E-06 | -5.925  | 2.83E-06 | -3.020  | 3.084E-13 | -2.875  | 8.169E-13 |
| <i>Dlk1</i>          | -4.419 | 1.25E-05 | -6.504 | 4.12E-05 | -6.013  | 6.14E-05 | -14.710 | 2.72E-08 | -17.208 | 1.44E-08 | -1.100  | 4.622E-03 | -1.176  | 1.851E-05 |
| <i>Dscc1</i>         | -8.009 | 9.62E-03 | -4.144 | 1.59E-04 | -6.262  | 1.48E-05 | -7.727  | 9.29E-05 | -8.086  | 7.62E-05 | -2.390  | 2.684E-11 | -3.473  | 1.296E-14 |
| <i>Dzip1</i>         | -1.316 | 3.97E-02 | -2.088 | 8.43E-06 | -1.727  | 1.40E-04 | -1.381  | 5.79E-04 | -1.262  | 5.83E-03 | -2.127  | 4.432E-15 | -2.775  | 4.706E-18 |
| <i>E130203B14Rik</i> | -1.559 | 2.33E-05 | -2.371 | 2.29E-08 | -2.248  | 4.69E-08 | -1.174  | 6.91E-02 | -1.431  | 7.81E-04 | -2.078  | 2.282E-14 | -3.271  | 3.965E-19 |
| <i>E2f8</i>          | -2.662 | 4.49E-02 | -3.494 | 2.54E-03 | -5.140  | 3.26E-04 | -6.114  | 2.17E-03 | -8.839  | 5.38E-04 | -2.484  | 4.062E-13 | -2.345  | 1.644E-12 |
| <i>Ect2</i>          | -2.487 | 2.38E-05 | -1.984 | 1.03E-02 | -4.384  | 2.70E-05 | -2.148  | 6.75E-05 | -2.943  | 2.29E-06 | -2.113  | 2.949E-09 | -1.940  | 2.725E-08 |
| <i>Eif5a2</i>        | -1.740 | 8.69E-03 | -1.418 | 3.15E-02 | -1.664  | 4.00E-03 | -1.448  | 7.05E-04 | -1.754  | 1.76E-05 | -2.168  | 7.856E-13 | -2.075  | 2.704E-12 |
| <i>Eln</i>           | -7.873 | 3.25E-07 | -3.603 | 1.09E-09 | -4.518  | 1.65E-10 | -2.917  | 4.97E-07 | -6.475  | 9.70E-10 | -1.222  | 8.532E-03 | -2.841  | 1.243E-13 |
| <i>Emilin1</i>       | -3.376 | 9.84E-03 | -7.865 | 2.56E-04 | -8.351  | 2.00E-04 | -4.513  | 7.69E-04 | -2.800  | 1.00E-02 | -2.051  | 2.968E-14 | -3.709  | 3.272E-20 |
| <i>Ephx1</i>         | 2.177  | 5.06E-06 | 2.403  | 1.88E-09 | 1.852   | 1.00E-07 | 3.212   | 1.52E-09 | 3.668   | 4.38E-10 | 2.059   | 2.202E-17 | 3.245   | 2.517E-22 |
| <i>Esco2</i>         | -4.705 | 3.01E-02 | -2.997 | 2.54E-02 | -64.686 | 5.03E-07 | -3.015  | 3.23E-06 | -4.118  | 2.31E-07 | -2.575  | 3.618E-11 | -2.114  | 3.522E-09 |
| <i>Espl1</i>         | -1.517 | 1.58E-02 | -2.012 | 4.63E-05 | -3.138  | 3.11E-07 | -1.816  | 7.84E-07 | -1.911  | 3.24E-07 | -2.673  | 2.616E-12 | -3.215  | 6.469E-14 |
| <i>Evl</i>           | -2.232 | 2.65E-05 | -3.894 | 6.08E-09 | -5.778  | 3.23E-10 | -2.024  | 3.50E-07 | -2.202  | 1.02E-07 | -1.450  | 1.321E-10 | -1.665  | 1.754E-13 |
| <i>Ezh2</i>          | -2.647 | 8.29E-04 | -2.737 | 4.44E-07 | -3.622  | 2.98E-08 | -2.734  | 3.01E-09 | -3.139  | 6.83E-10 | -2.195  | 2.013E-13 | -2.848  | 3.531E-16 |
| <i>F630043A04Rik</i> | -3.925 | 1.47E-02 | -3.657 | 1.10E-02 | -18.889 | 1.89E-05 | -3.760  | 1.76E-06 | -5.111  | 1.89E-07 | -2.341  | 3.813E-11 | -2.115  | 4.844E-10 |
| <i>Fam171a1</i>      | -1.899 | 8.73E-05 | -1.917 | 4.96E-07 | -1.759  | 2.21E-06 | -1.697  | 1.42E-06 | -1.941  | 1.24E-07 | -2.220  | 9.049E-05 | -2.612  | 8.073E-06 |
| <i>Fam83d</i>        | -3.743 | 4.63E-03 | -1.539 | 1.73E-02 | -2.210  | 2.75E-04 | -1.826  | 2.38E-03 | -2.400  | 1.21E-04 | -1.465  | 4.477E-06 | -2.056  | 6.000E-11 |
| <i>Fas</i>           | 2.797  | 4.64E-04 | 2.048  | 1.83E-02 | 2.423   | 5.57E-03 | 3.026   | 2.16E-06 | 2.648   | 7.99E-06 | 1.409   | 5.132E-07 | 1.129   | 2.492E-02 |
| <i>Fat4</i>          | -2.658 | 1.38E-05 | -6.746 | 1.12E-06 | -7.842  | 4.99E-07 | -2.654  | 3.67E-06 | -2.545  | 5.74E-06 | -1.982  | 1.846E-10 | -5.237  | 7.213E-19 |
| <i>Fbln2</i>         | -1.755 | 1.13E-04 | -2.202 | 1.89E-04 | -2.331  | 1.03E-04 | -2.208  | 5.02E-05 | -2.900  | 2.73E-06 | -2.954  | 4.606E-18 | -3.042  | 2.482E-18 |
| <i>Fbn1</i>          | -2.238 | 6.69E-05 | -3.898 | 2.64E-09 | -6.281  | 8.09E-11 | -2.340  | 5.88E-09 | -2.810  | 6.25E-10 | -1.926  | 2.272E-12 | -3.294  | 3.789E-18 |
| <i>Fbn2</i>          | -9.365 | 6.98E-06 | -9.223 | 5.48E-05 | -8.119  | 9.41E-05 | -9.921  | 2.55E-09 | -14.197 | 4.77E-10 | -32.264 | 2.613E-27 | -22.707 | 3.311E-26 |
| <i>Fgd1</i>          | -2.451 | 3.04E-02 | -2.736 | 3.96E-02 | -6.917  | 8.14E-04 | -1.992  | 7.43E-02 | -2.541  | 2.14E-02 | -1.640  | 4.523E-10 | -1.569  | 2.715E-09 |
| <i>Fgf1</i>          | 2.116  | 1.44E-05 | 1.781  | 4.09E-07 | 1.956   | 7.91E-08 | 1.706   | 2.90E-07 | 1.916   | 3.32E-08 | 2.475   | 7.359E-13 | 4.112   | 3.761E-17 |
| <i>Figf</i>          | -1.422 | 2.22E-02 | -1.467 | 7.39E-05 | -2.238  | 3.39E-08 | -1.361  | 5.49E-04 | -2.024  | 1.79E-07 | -3.634  | 2.549E-16 | -2.307  | 3.495E-12 |
| <i>Fkbp10</i>        | -2.385 | 2.10E-05 | -3.188 | 5.53E-07 | -4.273  | 4.70E-08 | -2.711  | 6.77E-07 | -4.288  | 1.04E-08 | -2.057  | 7.289E-17 | -3.586  | 1.224E-22 |
| <i>Fmo1</i>          | 1.714  | 2.42E-05 | 2.304  | 4.23E-10 | 2.480   | 1.58E-10 | 2.547   | 1.40E-11 | 2.652   | 8.47E-12 | 8.250   | 1.579E-20 | 3.521   | 2.253E-15 |
| <i>Fmo2</i>          | 2.687  | 7.84E-03 | 2.276  | 3.54E-08 | 2.136   | 8.69E-08 | 7.707   | 6.22E-12 | 5.003   | 1.02E-10 | 12.864  | 4.270E-19 | 3.011   | 4.904E-11 |
| <i>Fn1</i>           | -4.034 | 5.34E-08 | -4.937 | 2.03E-10 | -6.332  | 3.72E-11 | -1.807  | 1.01E-09 | -2.762  | 1.79E-12 | -1.457  | 1.165E-10 | -3.731  | 7.418E-23 |



|                  |        |          |         |          |         |          |        |          |        |          |        |           |         |           |
|------------------|--------|----------|---------|----------|---------|----------|--------|----------|--------|----------|--------|-----------|---------|-----------|
| <i>Fndc1</i>     | -2.405 | 2.46E-05 | -3.250  | 1.41E-05 | -3.688  | 5.10E-06 | -4.232 | 4.98E-10 | -3.852 | 1.09E-09 | -5.279 | 1.165E-16 | -4.122  | 4.372E-15 |
| <i>Foxm1</i>     | -2.452 | 1.13E-02 | -2.633  | 1.54E-02 | -3.664  | 2.61E-03 | -3.954 | 5.83E-03 | -4.292 | 4.04E-03 | -2.208 | 7.909E-14 | -1.954  | 2.895E-12 |
| <i>Fras1</i>     | -4.259 | 6.86E-06 | -2.714  | 3.73E-07 | -3.288  | 5.43E-08 | -2.402 | 5.77E-07 | -3.664 | 7.38E-09 | -1.236 | 7.686E-03 | -1.451  | 3.111E-05 |
| <i>Fscn1</i>     | -2.116 | 3.31E-05 | -4.931  | 1.49E-08 | -6.533  | 2.34E-09 | -4.043 | 1.30E-09 | -3.704 | 2.74E-09 | -2.048 | 7.697E-09 | -2.508  | 6.245E-11 |
| <i>Fstl1</i>     | -2.216 | 1.52E-06 | -9.118  | 7.29E-11 | -12.766 | 1.38E-11 | -2.905 | 1.38E-09 | -4.502 | 2.50E-11 | -1.645 | 6.983E-12 | -3.377  | 1.356E-20 |
| <i>Gbp3</i>      | 2.127  | 1.13E-05 | 2.272   | 1.03E-03 | 2.696   | 2.23E-04 | 2.738  | 9.48E-08 | 2.624  | 1.52E-07 | 2.333  | 4.886E-10 | 1.402   | 5.404E-04 |
| <i>Gda</i>       | 3.875  | 2.57E-06 | 3.546   | 3.06E-09 | 3.151   | 9.32E-09 | 1.501  | 1.34E-03 | 1.349  | 9.97E-03 | 2.129  | 6.773E-08 | 4.274   | 1.630E-13 |
| <i>Gja7</i>      | -2.383 | 2.65E-04 | -8.082  | 1.18E-03 | -13.895 | 1.82E-04 | -1.676 | 3.59E-02 | -2.137 | 4.61E-03 | -3.625 | 9.330E-21 | -3.809  | 3.864E-21 |
| <i>Gli2</i>      | -3.926 | 4.41E-03 | -15.054 | 3.30E-09 | -21.042 | 8.65E-10 | -3.167 | 5.15E-06 | -4.849 | 1.86E-07 | -1.693 | 2.277E-09 | -2.455  | 3.718E-14 |
| <i>Glul</i>      | 2.284  | 3.63E-04 | 4.823   | 1.78E-09 | 3.799   | 1.17E-08 | 2.146  | 2.56E-06 | 2.167  | 2.24E-06 | 1.221  | 2.851E-04 | 1.863   | 1.616E-12 |
| <i>Got1l1</i>    | 2.832  | 2.85E-02 | 2.506   | 1.46E-02 | 2.447   | 1.67E-02 | 4.529  | 6.78E-04 | 2.811  | 9.08E-03 | 1.235  | 2.909E-04 | 1.124   | 2.762E-02 |
| <i>Gpc2</i>      | -1.587 | 8.86E-03 | -2.444  | 9.56E-03 | -4.346  | 2.79E-04 | -2.347 | 1.30E-03 | -3.360 | 6.96E-05 | -2.267 | 8.224E-15 | -3.462  | 6.202E-19 |
| <i>Gpc3</i>      | -2.829 | 1.89E-03 | -7.146  | 2.02E-09 | -11.240 | 1.83E-10 | -1.757 | 1.49E-06 | -2.352 | 1.56E-08 | -2.498 | 2.137E-09 | -8.827  | 1.960E-17 |
| <i>Gpr23</i>     | -3.000 | 1.24E-04 | -8.300  | 1.46E-07 | -7.617  | 2.29E-07 | -2.749 | 2.66E-06 | -5.445 | 9.51E-09 | -2.287 | 6.974E-10 | -2.856  | 5.710E-12 |
| <i>Gpsm2</i>     | -5.859 | 1.72E-02 | -2.592  | 2.25E-03 | -2.168  | 8.55E-03 | -2.559 | 2.86E-07 | -2.964 | 5.79E-08 | -2.045 | 6.354E-10 | -1.584  | 1.477E-06 |
| <i>Gpx7</i>      | -2.310 | 1.11E-06 | -2.571  | 1.72E-07 | -3.795  | 3.56E-09 | -1.766 | 1.90E-07 | -2.393 | 1.53E-09 | -1.294 | 2.929E-05 | -2.145  | 7.839E-14 |
| <i>Grb10</i>     | -2.443 | 7.13E-07 | -4.316  | 1.23E-10 | -4.654  | 6.81E-11 | -3.029 | 5.05E-10 | -3.533 | 1.11E-10 | -2.593 | 5.281E-21 | -2.313  | 1.040E-19 |
| <i>Gsta3</i>     | 33.739 | 2.59E-05 | 4.024   | 1.28E-08 | 4.413   | 6.19E-09 | 7.358  | 1.33E-09 | 5.521  | 7.91E-09 | 4.269  | 6.208E-17 | 9.360   | 2.747E-21 |
| <i>Gstm1</i>     | 3.171  | 2.36E-07 | 3.468   | 1.97E-11 | 3.850   | 7.61E-12 | 2.726  | 1.38E-11 | 3.354  | 1.49E-12 | 1.557  | 1.081E-02 | 1.419   | 3.884E-02 |
| <i>Gtse1</i>     | -3.010 | 1.12E-02 | -4.662  | 4.95E-07 | -5.044  | 2.89E-07 | -3.648 | 7.15E-04 | -2.903 | 2.96E-03 | -1.186 | 5.171E-03 | -1.268  | 2.534E-04 |
| <i>H1fx</i>      | -8.592 | 2.29E-04 | -5.621  | 3.21E-05 | -9.253  | 2.58E-06 | -3.638 | 4.50E-03 | -5.051 | 9.10E-04 | -1.886 | 5.765E-10 | -3.483  | 3.170E-16 |
| <i>H2afx</i>     | -2.351 | 5.36E-05 | -2.140  | 1.05E-06 | -2.648  | 7.20E-08 | -2.322 | 4.51E-08 | -2.191 | 9.97E-08 | -2.107 | 9.957E-10 | -2.282  | 1.343E-10 |
| <i>H2afy2</i>    | -3.168 | 1.52E-05 | -1.955  | 8.07E-04 | -2.458  | 6.68E-05 | -2.744 | 2.02E-07 | -3.398 | 2.41E-08 | -2.215 | 5.406E-17 | -2.223  | 4.872E-17 |
| <i>H2-D1</i>     | 1.769  | 5.48E-04 | 1.367   | 1.18E-02 | 1.857   | 7.64E-05 | 2.523  | 4.58E-08 | 3.415  | 1.85E-09 | 7.150  | 6.714E-05 | 4.060   | 2.205E-03 |
| <i>H2-DMa</i>    | 1.488  | 1.42E-02 | 1.054   | 5.12E-01 | 1.188   | 4.76E-02 | 1.991  | 1.97E-06 | 3.027  | 1.09E-08 | 2.035  | 1.410E-11 | 2.563   | 3.480E-14 |
| <i>H2-Eb1</i>    | 2.645  | 1.37E-05 | 2.045   | 1.50E-04 | 3.187   | 1.38E-06 | 2.985  | 1.78E-08 | 5.030  | 2.01E-10 | 4.061  | 9.523E-10 | 8.355   | 1.838E-13 |
| <i>H2-T23</i>    | 1.956  | 4.03E-05 | 2.607   | 4.52E-06 | 2.968   | 1.21E-06 | 2.551  | 8.40E-10 | 3.535  | 2.57E-11 | 2.825  | 1.747E-11 | 2.727   | 3.549E-11 |
| <i>H3f3b</i>     | -2.888 | 2.80E-02 | -3.416  | 9.57E-03 | -3.304  | 1.12E-02 | -1.331 | 1.89E-01 | -2.027 | 4.87E-03 | -1.303 | 3.962E-12 | -1.710  | 5.509E-19 |
| <i>Herpud1</i>   | 2.487  | 1.76E-04 | 5.698   | 1.85E-08 | 5.295   | 3.01E-08 | 2.319  | 1.42E-08 | 2.904  | 9.43E-10 | 1.875  | 4.751E-12 | 2.077   | 1.878E-13 |
| <i>Hist1h2bc</i> | 1.161  | 5.79E-03 | 1.765   | 5.91E-05 | 2.105   | 4.27E-06 | 1.653  | 4.43E-07 | 2.126  | 4.84E-09 | 2.295  | 2.047E-12 | 4.253   | 9.020E-18 |
| <i>Hmcn1</i>     | -2.899 | 1.02E-04 | -16.566 | 2.99E-09 | -24.032 | 7.14E-10 | -2.132 | 4.92E-07 | -2.126 | 5.12E-07 | -2.181 | 5.529E-13 | -7.008  | 4.891E-22 |
| <i>Hmgb2</i>     | -2.572 | 5.01E-04 | -5.018  | 3.59E-07 | -6.522  | 6.90E-08 | -2.640 | 6.59E-07 | -3.283 | 7.25E-08 | -1.854 | 5.608E-11 | -3.442  | 1.443E-17 |
| <i>Hmgn2</i>     | -2.063 | 1.85E-05 | -2.540  | 1.51E-06 | -3.426  | 7.46E-08 | -1.822 | 8.38E-05 | -2.172 | 7.15E-06 | -1.471 | 3.338E-13 | -2.041  | 3.285E-19 |
| <i>Hsd11b1</i>   | 2.716  | 6.52E-05 | 4.706   | 6.67E-10 | 5.369   | 2.58E-10 | 3.492  | 8.23E-11 | 2.671  | 1.36E-09 | 1.610  | 4.831E-10 | 10.993  | 7.443E-26 |
| <i>Hspa4</i>     | 2.084  | 2.04E-04 | 2.206   | 2.50E-07 | 2.138   | 3.87E-07 | 3.162  | 2.69E-05 | 5.434  | 5.27E-07 | 1.359  | 1.323E-08 | 1.266   | 1.130E-06 |
| <i>Hspa4l</i>    | 1.599  | 4.28E-06 | 1.528   | 6.30E-06 | 1.790   | 2.24E-07 | 2.420  | 1.29E-09 | 2.598  | 5.26E-10 | 2.009  | 4.803E-10 | 3.197   | 1.059E-14 |
| <i>Hspa8</i>     | 2.144  | 1.77E-02 | 2.131   | 9.63E-04 | 3.847   | 5.34E-06 | 1.847  | 1.87E-02 | 4.336  | 2.95E-05 | 1.076  | 3.758E-04 | 1.096   | 2.628E-05 |
| <i>Ifi205</i>    | 6.041  | 4.40E-06 | 2.064   | 7.07E-04 | 2.660   | 5.35E-05 | 3.230  | 2.35E-07 | 4.715  | 1.05E-08 | 1.677  | 2.469E-03 | 2.602   | 1.838E-06 |
| <i>Ifi27</i>     | 3.973  | 2.25E-05 | 1.945   | 9.10E-03 | 1.848   | 1.42E-02 | 4.076  | 6.29E-08 | 6.597  | 2.25E-09 | 2.793  | 2.436E-07 | 3.351   | 1.442E-08 |
| <i>Ifit3</i>     | 3.367  | 1.96E-06 | 1.752   | 1.36E-05 | 1.504   | 2.54E-04 | 5.930  | 1.20E-11 | 4.209  | 1.48E-10 | 3.682  | 2.187E-12 | 2.314   | 1.324E-08 |
| <i>Igf2</i>      | -7.117 | 7.41E-07 | -4.712  | 5.94E-08 | -4.905  | 4.47E-08 | -4.367 | 1.90E-08 | -5.181 | 5.49E-09 | -5.113 | 4.048E-13 | -10.390 | 1.354E-16 |
| <i>Igf2bp3</i>   | -7.982 | 4.44E-04 | -4.099  | 4.35E-03 | -4.915  | 1.91E-03 | -5.283 | 7.90E-04 | -5.418 | 7.02E-04 | -4.420 | 9.587E-17 | -5.259  | 7.629E-18 |
| <i>Igh-6</i>     | 1.990  | 1.38E-03 | 1.380   | 2.31E-02 | 1.707   | 9.95E-04 | 1.875  | 1.72E-01 | 3.843  | 9.01E-03 | 2.172  | 5.057E-06 | 2.200   | 3.978E-06 |

|                 |        |          |         |          |         |          |         |          |         |          |        |           |         |           |
|-----------------|--------|----------|---------|----------|---------|----------|---------|----------|---------|----------|--------|-----------|---------|-----------|
| <i>Igsf3</i>    | -1.794 | 2.64E-04 | -1.767  | 8.98E-05 | -1.758  | 9.81E-05 | -1.631  | 2.05E-05 | -1.901  | 1.30E-06 | -2.265 | 1.351E-09 | -2.278  | 1.182E-09 |
| <i>Igtp</i>     | 2.033  | 2.35E-05 | 1.547   | 4.48E-03 | 2.136   | 5.58E-05 | 1.569   | 1.37E-03 | 1.787   | 1.78E-04 | 2.971  | 4.079E-10 | 2.275   | 7.396E-08 |
| <i>Incenp</i>   | -2.503 | 9.53E-05 | -2.471  | 2.06E-05 | -3.427  | 8.91E-07 | -2.829  | 9.10E-07 | -2.775  | 1.11E-06 | -1.606 | 1.569E-07 | -1.215  | 6.163E-03 |
| <i>Inmt</i>     | 3.638  | 1.04E-02 | 8.433   | 3.42E-12 | 12.595  | 4.44E-13 | 23.967  | 1.20E-10 | 23.488  | 1.29E-10 | 2.908  | 8.531E-06 | 3.628   | 4.971E-07 |
| <i>Iqgap3</i>   | -2.611 | 1.59E-04 | -1.848  | 1.85E-03 | -2.900  | 1.68E-05 | -2.232  | 5.97E-07 | -2.474  | 1.61E-07 | -1.706 | 2.223E-06 | -1.985  | 3.779E-08 |
| <i>Irf7</i>     | 1.841  | 5.52E-04 | 1.470   | 6.53E-03 | 1.391   | 1.56E-02 | 1.746   | 1.06E-05 | 1.633   | 3.64E-05 | 3.124  | 7.251E-10 | 3.718   | 4.277E-11 |
| <i>Kcne1l</i>   | -5.867 | 1.07E-03 | -2.507  | 3.97E-02 | -9.365  | 1.13E-04 | -3.284  | 7.08E-03 | -5.363  | 6.36E-04 | -2.371 | 1.789E-09 | -6.541  | 1.217E-16 |
| <i>Kif20a</i>   | -3.367 | 3.66E-03 | -2.050  | 1.00E-01 | -6.427  | 5.98E-04 | -3.210  | 2.19E-05 | -3.634  | 8.11E-06 | -2.346 | 3.320E-10 | -1.652  | 3.327E-06 |
| <i>Kif22</i>    | -3.219 | 1.67E-05 | -5.023  | 1.32E-05 | -11.546 | 1.71E-07 | -4.124  | 4.84E-07 | -3.764  | 9.85E-07 | -2.406 | 8.958E-11 | -2.452  | 5.802E-11 |
| <i>Kif2c</i>    | -3.548 | 2.40E-03 | -2.776  | 2.33E-04 | -5.171  | 2.51E-06 | -3.390  | 4.11E-06 | -4.581  | 4.05E-07 | -1.780 | 8.814E-13 | -1.323  | 7.897E-07 |
| <i>Kif9</i>     | 4.379  | 6.39E-07 | 3.312   | 1.05E-04 | 3.852   | 3.52E-05 | 6.621   | 4.13E-13 | 6.497   | 4.66E-13 | 2.832  | 9.232E-12 | 2.844   | 8.476E-12 |
| <i>Kntc1</i>    | -2.718 | 9.95E-03 | -2.588  | 1.58E-02 | -5.871  | 2.13E-04 | -3.175  | 2.61E-06 | -3.213  | 2.35E-06 | -2.380 | 6.536E-12 | -2.419  | 4.406E-12 |
| <i>Kntc2</i>    | -3.517 | 3.03E-04 | -3.288  | 5.27E-03 | -6.051  | 2.44E-04 | -2.241  | 1.64E-06 | -2.288  | 1.25E-06 | -2.284 | 7.884E-10 | -1.893  | 8.737E-08 |
| <i>Lamb1-1</i>  | -2.589 | 1.68E-04 | -3.211  | 4.15E-06 | -3.615  | 1.52E-06 | -2.110  | 1.92E-05 | -2.953  | 4.21E-07 | -2.142 | 9.502E-19 | -2.464  | 1.878E-20 |
| <i>Lhfp12</i>   | -4.682 | 4.76E-05 | -5.401  | 1.17E-09 | -6.743  | 2.78E-10 | -5.866  | 8.75E-10 | -6.134  | 6.56E-10 | -2.105 | 8.728E-10 | -2.395  | 3.668E-11 |
| <i>Lims2</i>    | 1.601  | 1.72E-04 | 2.152   | 6.38E-08 | 2.180   | 5.28E-08 | 3.308   | 6.23E-11 | 3.073   | 1.31E-10 | 2.940  | 6.736E-17 | 2.863   | 1.185E-16 |
| <i>Lox12</i>    | -1.405 | 2.24E-03 | -1.895  | 1.26E-07 | -2.421  | 3.28E-09 | -3.033  | 4.27E-10 | -3.573  | 8.57E-11 | -2.580 | 7.154E-13 | -2.006  | 4.098E-10 |
| <i>Lrrc17</i>   | -2.343 | 4.13E-05 | -12.252 | 9.87E-09 | -12.443 | 9.20E-09 | -2.531  | 6.02E-06 | -3.735  | 1.49E-07 | -2.471 | 1.365E-12 | -5.711  | 5.723E-19 |
| <i>Mad2l1</i>   | -2.710 | 1.64E-04 | -2.302  | 5.35E-05 | -3.789  | 4.73E-07 | -2.772  | 3.18E-06 | -3.265  | 6.67E-07 | -1.799 | 3.461E-09 | -1.325  | 2.331E-04 |
| <i>Maged1</i>   | -2.030 | 2.21E-06 | -2.418  | 2.32E-09 | -2.327  | 3.87E-09 | -2.301  | 9.95E-10 | -2.472  | 3.83E-10 | -1.751 | 8.528E-20 | -1.899  | 3.623E-21 |
| <i>Maged2</i>   | -4.402 | 2.00E-06 | -5.232  | 2.16E-09 | -6.429  | 5.59E-10 | -2.979  | 2.06E-08 | -3.709  | 2.57E-09 | -2.429 | 1.884E-18 | -4.641  | 4.974E-24 |
| <i>Mapt</i>     | 2.257  | 1.93E-02 | 3.071   | 6.62E-06 | 3.390   | 2.80E-06 | 1.999   | 1.09E-07 | 2.297   | 1.41E-08 | 1.838  | 2.853E-17 | 1.710   | 5.064E-16 |
| <i>Marcks1l</i> | -5.744 | 2.38E-07 | -7.652  | 2.82E-08 | -9.962  | 7.11E-09 | -6.267  | 1.54E-12 | -7.246  | 6.24E-13 | -2.194 | 2.615E-18 | -4.453  | 7.397E-25 |
| <i>Mcm2</i>     | -2.437 | 3.45E-03 | -2.754  | 1.07E-03 | -5.188  | 1.53E-05 | -2.454  | 3.62E-06 | -2.726  | 1.14E-06 | -1.747 | 1.470E-10 | -2.073  | 5.754E-13 |
| <i>Mcm3</i>     | -2.018 | 4.45E-03 | -6.154  | 8.34E-04 | -20.746 | 8.53E-06 | -4.187  | 4.86E-03 | -3.709  | 8.34E-03 | -1.735 | 1.371E-07 | -2.721  | 1.319E-12 |
| <i>Mcm4</i>     | -2.280 | 2.31E-03 | -2.269  | 9.20E-03 | -2.564  | 3.91E-03 | -2.495  | 1.19E-05 | -3.157  | 1.14E-06 | -2.434 | 3.578E-09 | -3.273  | 1.216E-11 |
| <i>Mcm5</i>     | -2.765 | 4.58E-05 | -2.526  | 5.20E-05 | -6.464  | 3.61E-08 | -3.145  | 1.83E-07 | -3.730  | 3.96E-08 | -2.021 | 7.934E-09 | -2.253  | 5.161E-10 |
| <i>Mcm6</i>     | -2.887 | 3.48E-06 | -2.852  | 1.52E-03 | -7.125  | 5.94E-06 | -2.388  | 7.14E-06 | -2.918  | 8.39E-07 | -2.408 | 1.267E-09 | -3.815  | 2.222E-13 |
| <i>Mcm7</i>     | -2.400 | 5.75E-06 | -2.140  | 6.19E-10 | -3.120  | 5.55E-12 | -2.016  | 5.00E-08 | -2.106  | 2.54E-08 | -1.584 | 9.052E-13 | -2.163  | 9.042E-18 |
| <i>Mdk</i>      | -4.513 | 8.89E-08 | -2.620  | 4.88E-09 | -2.245  | 3.52E-08 | -7.403  | 9.11E-13 | -11.078 | 1.03E-13 | -3.869 | 2.609E-17 | -3.832  | 3.070E-17 |
| <i>Meis1</i>    | -1.455 | 4.55E-02 | -8.784  | 4.27E-06 | -6.090  | 2.65E-05 | -1.354  | 5.22E-04 | -1.406  | 1.95E-04 | -2.219 | 5.332E-08 | -4.257  | 4.088E-13 |
| <i>Mest</i>     | -8.066 | 1.81E-08 | -13.935 | 4.46E-14 | -13.360 | 5.41E-14 | -10.946 | 1.98E-15 | -18.063 | 2.04E-16 | -3.944 | 1.369E-13 | -14.533 | 3.547E-20 |
| <i>Mettl7a</i>  | 2.045  | 4.85E-05 | 4.064   | 2.51E-11 | 4.166   | 2.04E-11 | 3.754   | 1.08E-08 | 3.690   | 1.26E-08 | 1.972  | 7.749E-10 | 1.935   | 1.346E-09 |
| <i>Mfap2</i>    | -3.543 | 4.48E-06 | -6.644  | 1.00E-08 | -8.331  | 2.76E-09 | -1.627  | 2.15E-04 | -2.197  | 2.17E-06 | -4.415 | 8.804E-19 | -8.315  | 2.175E-22 |
| <i>Mki67</i>    | -2.848 | 9.07E-03 | -3.606  | 8.16E-05 | -11.716 | 1.07E-07 | -4.347  | 4.80E-08 | -4.689  | 2.73E-08 | -2.483 | 2.732E-11 | -2.984  | 5.745E-13 |
| <i>Mmp14</i>    | -3.943 | 3.85E-07 | -5.690  | 2.62E-09 | -5.540  | 3.13E-09 | -2.983  | 1.08E-12 | -3.591  | 1.68E-13 | -2.150 | 2.083E-07 | -4.267  | 9.217E-13 |
| <i>Mmp23</i>    | -3.517 | 2.84E-02 | -9.314  | 4.69E-06 | -11.433 | 1.89E-06 | -1.893  | 5.55E-04 | -2.135  | 1.29E-04 | -2.506 | 1.790E-15 | -2.794  | 1.427E-16 |
| <i>Mphosph1</i> | -2.105 | 6.18E-04 | -1.943  | 2.58E-03 | -2.631  | 1.32E-04 | -2.060  | 3.77E-04 | -2.184  | 1.96E-04 | -2.541 | 6.602E-13 | -1.695  | 4.856E-08 |
| <i>Mpz1l</i>    | -2.615 | 7.29E-08 | -2.566  | 5.60E-08 | -2.500  | 7.62E-08 | -2.470  | 1.54E-10 | -2.512  | 1.24E-10 | -1.462 | 8.242E-11 | -2.066  | 6.474E-17 |
| <i>Mthfd2l</i>  | -1.270 | 4.94E-02 | -1.641  | 7.64E-05 | -1.601  | 1.21E-04 | -1.286  | 1.45E-03 | -1.409  | 1.16E-04 | -2.226 | 2.593E-11 | -3.919  | 2.320E-16 |
| <i>Mxd3</i>     | -3.677 | 8.91E-04 | -2.552  | 3.53E-03 | -3.085  | 9.45E-04 | -5.010  | 1.50E-06 | -4.117  | 5.74E-06 | -2.428 | 4.243E-13 | -1.773  | 3.027E-09 |
| <i>Mycn</i>     | -1.398 | 1.14E-02 | -1.831  | 1.55E-05 | -2.011  | 3.66E-06 | -5.835  | 2.54E-05 | -8.430  | 3.87E-06 | -2.002 | 1.287E-04 | -2.433  | 1.802E-10 |
| <i>Myh10</i>    | -2.499 | 2.92E-05 | -2.907  | 3.93E-10 | -3.138  | 1.75E-10 | -1.994  | 1.63E-09 | -2.100  | 7.08E-10 | -1.417 | 2.921E-10 | -2.957  | 3.542E-21 |

|                |         |          |         |          |         |          |         |          |         |          |        |           |        |           |
|----------------|---------|----------|---------|----------|---------|----------|---------|----------|---------|----------|--------|-----------|--------|-----------|
| <i>Myl9</i>    | -2.573  | 2.66E-04 | -4.050  | 6.48E-12 | -4.379  | 3.41E-12 | -2.213  | 8.10E-07 | -2.717  | 6.64E-08 | -1.715 | 4.054E-10 | -3.811 | 1.015E-18 |
| <i>Nampt</i>   | 4.342   | 4.44E-05 | 2.623   | 1.22E-03 | 2.578   | 1.39E-03 | 3.014   | 5.07E-07 | 2.099   | 2.91E-05 | 1.785  | 6.685E-14 | 1.853  | 1.676E-14 |
| <i>Ncapd2</i>  | -1.656  | 5.76E-03 | -3.058  | 4.77E-06 | -4.053  | 4.53E-07 | -3.352  | 4.58E-06 | -3.744  | 1.86E-06 | -2.527 | 9.193E-12 | -2.722 | 1.817E-12 |
| <i>Ncapg2</i>  | -2.102  | 1.85E-03 | -2.419  | 3.50E-03 | -4.413  | 5.42E-05 | -2.873  | 6.46E-07 | -4.182  | 2.28E-08 | -1.348 | 3.085E-05 | -1.286 | 2.398E-04 |
| <i>Ncaph</i>   | -2.035  | 1.74E-04 | -2.219  | 2.02E-05 | -2.680  | 2.39E-06 | -2.524  | 1.55E-08 | -2.550  | 1.37E-08 | -2.423 | 2.401E-13 | -1.987 | 4.997E-11 |
| <i>Ndn</i>     | -2.498  | 1.03E-07 | -7.157  | 2.00E-11 | -10.491 | 2.46E-12 | -2.965  | 9.73E-10 | -3.634  | 1.32E-10 | -1.831 | 1.123E-09 | -6.440 | 2.254E-20 |
| <i>Nnat</i>    | -4.148  | 2.37E-05 | -7.716  | 1.44E-05 | -14.056 | 1.04E-06 | -3.409  | 1.51E-10 | -3.058  | 4.45E-10 | -1.792 | 1.290E-05 | -4.240 | 9.910E-13 |
| <i>Nope</i>    | -1.775  | 6.41E-04 | -6.068  | 2.11E-03 | -6.062  | 2.11E-03 | -2.422  | 6.30E-05 | -3.736  | 1.20E-06 | -4.627 | 1.097E-18 | -6.265 | 1.641E-20 |
| <i>Npas3</i>   | -6.718  | 3.21E-02 | -6.990  | 4.32E-03 | -5.660  | 8.73E-03 | -5.482  | 7.34E-03 | -9.950  | 9.45E-04 | -1.274 | 1.512E-05 | -1.899 | 3.125E-13 |
| <i>Nr1d1</i>   | 2.507   | 4.37E-04 | 4.260   | 4.32E-05 | 6.270   | 4.25E-06 | 11.694  | 1.68E-07 | 13.576  | 8.76E-08 | 5.892  | 3.037E-18 | 3.914  | 1.195E-15 |
| <i>Nr1d2</i>   | 2.917   | 6.03E-05 | 3.376   | 9.94E-09 | 2.856   | 5.25E-08 | 4.277   | 1.65E-10 | 3.435   | 1.10E-09 | 1.928  | 1.111E-10 | 1.815  | 7.429E-10 |
| <i>Nrm</i>     | -2.116  | 3.99E-03 | -1.983  | 3.08E-04 | -2.088  | 1.65E-04 | -1.773  | 6.43E-05 | -2.185  | 3.09E-06 | -2.041 | 3.144E-10 | -2.516 | 1.628E-12 |
| <i>Nt5dc2</i>  | -2.386  | 1.65E-07 | -2.083  | 2.46E-07 | -3.236  | 1.24E-09 | -1.371  | 9.09E-04 | -1.808  | 2.91E-06 | -2.120 | 7.375E-12 | -4.505 | 1.467E-18 |
| <i>Nuf2</i>    | -4.173  | 4.42E-04 | -3.216  | 2.50E-03 | -17.548 | 7.47E-07 | -4.830  | 3.34E-08 | -5.220  | 1.94E-08 | -2.392 | 9.247E-11 | -2.297 | 2.378E-10 |
| <i>Nupr1</i>   | 1.751   | 6.63E-03 | 1.200   | 8.05E-02 | 1.275   | 2.61E-02 | 2.234   | 4.46E-07 | 2.089   | 1.13E-06 | 2.083  | 1.532E-04 | 3.096  | 3.825E-07 |
| <i>Nusap1</i>  | -2.117  | 4.45E-05 | -2.197  | 1.50E-05 | -4.969  | 7.31E-09 | -3.180  | 3.02E-08 | -3.601  | 9.56E-09 | -2.259 | 4.308E-11 | -2.496 | 3.985E-12 |
| <i>Oas1a</i>   | 2.463   | 1.78E-04 | 1.573   | 1.19E-02 | 1.408   | 4.54E-02 | 1.753   | 5.06E-04 | 2.290   | 1.53E-05 | 5.205  | 1.050E-13 | 2.453  | 2.159E-08 |
| <i>Omd</i>     | 2.179   | 4.92E-04 | 4.398   | 3.07E-08 | 4.299   | 3.65E-08 | 6.110   | 2.15E-06 | 5.280   | 5.11E-06 | 3.314  | 2.940E-11 | 2.132  | 1.633E-07 |
| <i>Osgin1</i>  | 3.526   | 2.91E-02 | 9.384   | 2.24E-08 | 9.118   | 2.59E-08 | 10.206  | 2.43E-07 | 10.155  | 2.49E-07 | 1.509  | 2.760E-08 | 11.272 | 3.087E-25 |
| <i>Parp14</i>  | 2.028   | 1.42E-03 | 1.292   | 5.87E-02 | 1.525   | 4.93E-03 | 1.773   | 3.71E-05 | 2.009   | 5.39E-06 | 2.246  | 4.679E-12 | 1.996  | 1.189E-10 |
| <i>Pbk</i>     | -2.687  | 6.64E-06 | -1.806  | 2.19E-03 | -4.773  | 2.72E-07 | -3.233  | 4.68E-07 | -3.671  | 1.53E-07 | -1.920 | 7.823E-08 | -1.418 | 4.451E-04 |
| <i>Pcolce2</i> | 2.089   | 5.01E-05 | 4.441   | 6.41E-05 | 4.820   | 3.90E-05 | 3.407   | 4.96E-12 | 3.066   | 1.43E-11 | 7.631  | 6.012E-13 | 1.860  | 2.935E-04 |
| <i>Pdlim3</i>  | -2.326  | 1.30E-05 | -3.183  | 9.38E-03 | -4.101  | 2.69E-03 | -6.250  | 2.35E-07 | -4.674  | 1.49E-06 | -2.070 | 4.201E-13 | -2.314 | 1.872E-14 |
| <i>Pdlim7</i>  | -2.009  | 2.34E-05 | -3.573  | 5.43E-08 | -4.308  | 1.17E-08 | -2.412  | 5.68E-10 | -2.576  | 2.45E-10 | -2.215 | 1.626E-12 | -3.445 | 9.479E-17 |
| <i>Pdzrn3</i>  | -1.490  | 1.46E-03 | -1.877  | 9.76E-06 | -1.956  | 5.13E-06 | -2.785  | 8.86E-09 | -2.852  | 6.84E-09 | -2.275 | 1.143E-17 | -2.275 | 1.149E-17 |
| <i>Peg3</i>    | -3.101  | 5.07E-05 | -6.290  | 3.43E-11 | -6.519  | 2.73E-11 | -5.410  | 1.76E-12 | -8.545  | 1.02E-13 | -2.064 | 9.322E-11 | -2.186 | 1.972E-11 |
| <i>Pim3</i>    | 2.716   | 3.67E-05 | 3.926   | 3.35E-08 | 4.459   | 1.23E-08 | 2.520   | 5.75E-07 | 4.202   | 4.31E-09 | 1.546  | 2.816E-06 | 3.044  | 5.143E-14 |
| <i>Plagl1</i>  | -5.515  | 6.69E-06 | -3.281  | 1.97E-09 | -3.461  | 1.19E-09 | -1.816  | 4.77E-08 | -2.118  | 3.55E-09 | -4.667 | 4.640E-17 | -5.580 | 3.734E-18 |
| <i>Plekhh2</i> | -1.593  | 1.07E-02 | -3.353  | 2.04E-05 | -3.750  | 8.55E-06 | -1.536  | 1.09E-04 | -1.707  | 1.38E-05 | -2.189 | 2.292E-06 | -4.837 | 6.348E-12 |
| <i>Plk4</i>    | -2.035  | 1.85E-02 | -1.626  | 3.78E-03 | -2.402  | 3.15E-05 | -1.895  | 5.70E-04 | -2.479  | 2.59E-05 | -2.434 | 1.324E-10 | -3.190 | 5.309E-13 |
| <i>Plscr2</i>  | 2.884   | 6.24E-04 | 2.402   | 3.34E-04 | 2.434   | 2.94E-04 | 3.908   | 2.24E-07 | 3.315   | 8.95E-07 | 6.081  | 8.696E-17 | 2.270  | 1.708E-09 |
| <i>Plxnd1</i>  | -1.628  | 7.84E-05 | -2.791  | 1.24E-07 | -3.269  | 2.51E-08 | -1.940  | 4.01E-07 | -1.821  | 1.18E-06 | -2.179 | 5.742E-12 | -2.170 | 6.448E-12 |
| <i>Podxl2</i>  | -3.818  | 5.02E-04 | -26.686 | 3.88E-07 | -33.244 | 1.92E-07 | -2.908  | 9.94E-03 | -3.670  | 2.91E-03 | -2.294 | 1.728E-12 | -4.235 | 7.950E-18 |
| <i>Pole</i>    | -3.088  | 2.35E-04 | -10.072 | 1.17E-08 | -19.137 | 7.02E-10 | -22.157 | 7.79E-08 | -23.879 | 5.98E-08 | -2.241 | 2.933E-12 | -2.641 | 5.453E-14 |
| <i>Prc1</i>    | -2.524  | 7.14E-04 | -2.798  | 1.78E-04 | -4.016  | 1.07E-05 | -3.047  | 1.42E-08 | -3.872  | 1.53E-09 | -1.844 | 2.113E-08 | -1.805 | 3.937E-08 |
| <i>Prelp</i>   | 1.643   | 1.30E-03 | 2.448   | 2.57E-06 | 2.599   | 1.31E-06 | 5.784   | 4.63E-12 | 7.195   | 1.16E-12 | 3.224  | 1.517E-17 | 2.683  | 7.387E-16 |
| <i>Prkg1</i>   | -1.252  | 4.05E-02 | -1.862  | 3.96E-05 | -1.817  | 5.79E-05 | -1.270  | 1.80E-05 | -1.383  | 7.82E-07 | -2.352 | 3.829E-10 | -4.995 | 5.403E-16 |
| <i>Psemb8</i>  | 2.215   | 3.27E-05 | 1.164   | 3.14E-01 | 1.563   | 9.35E-03 | 1.919   | 4.64E-07 | 2.594   | 6.79E-09 | 3.380  | 6.004E-11 | 3.267  | 1.063E-10 |
| <i>Psemb9</i>  | 1.880   | 6.04E-03 | 1.345   | 3.29E-02 | 1.631   | 1.82E-03 | 1.905   | 4.96E-07 | 2.593   | 6.44E-09 | 2.884  | 3.725E-10 | 3.082  | 1.114E-10 |
| <i>Ptbp2</i>   | -1.321  | 1.74E-02 | -1.494  | 3.49E-02 | -1.627  | 1.37E-02 | -1.450  | 2.97E-05 | -1.580  | 3.79E-06 | -2.746 | 7.249E-13 | -5.063 | 1.927E-17 |
| <i>Ptk7</i>    | -2.421  | 3.07E-03 | -12.125 | 5.07E-07 | -19.441 | 7.66E-08 | -2.223  | 1.19E-06 | -3.297  | 1.47E-08 | -1.706 | 1.889E-13 | -3.764 | 1.782E-22 |
| <i>Ptn</i>     | -11.663 | 1.81E-07 | -16.372 | 1.97E-08 | -15.161 | 2.70E-08 | -4.452  | 3.95E-06 | -5.766  | 7.45E-07 | -2.885 | 1.531E-11 | -2.967 | 8.892E-12 |
| <i>Pyocr1</i>  | -1.342  | 4.10E-02 | -8.477  | 1.43E-05 | -10.917 | 4.66E-06 | -1.664  | 1.01E-03 | -2.324  | 1.19E-05 | -2.026 | 1.358E-15 | -2.518 | 2.968E-18 |

|                 |         |          |         |          |         |          |         |          |         |          |        |           |        |           |
|-----------------|---------|----------|---------|----------|---------|----------|---------|----------|---------|----------|--------|-----------|--------|-----------|
| <i>Racgap1</i>  | -2.223  | 3.58E-03 | -1.694  | 4.61E-04 | -2.424  | 3.74E-06 | -2.337  | 3.89E-06 | -2.481  | 1.92E-06 | -2.172 | 8.971E-11 | -2.466 | 3.948E-12 |
| <i>Rad51</i>    | -4.707  | 1.52E-02 | -9.011  | 3.89E-07 | -18.675 | 1.64E-08 | -2.840  | 1.09E-06 | -3.379  | 2.08E-07 | -2.293 | 1.551E-07 | -3.270 | 2.209E-10 |
| <i>Rad51ap1</i> | -11.552 | 4.48E-04 | -8.021  | 2.12E-03 | -9.124  | 1.38E-03 | -6.033  | 3.24E-03 | -15.067 | 1.30E-04 | -1.762 | 2.826E-10 | -1.850 | 5.400E-11 |
| <i>Rap2a</i>    | -1.538  | 4.46E-04 | -1.919  | 1.65E-09 | -1.905  | 1.87E-09 | -2.093  | 3.33E-10 | -2.128  | 2.57E-10 | -2.009 | 7.946E-08 | -2.433 | 9.402E-10 |
| <i>Rcor2</i>    | -2.506  | 4.49E-03 | -3.209  | 7.90E-04 | -2.254  | 9.14E-03 | -2.929  | 4.01E-03 | -2.556  | 9.21E-03 | -1.229 | 1.192E-04 | -1.352 | 6.139E-07 |
| <i>Rfc3</i>     | -3.201  | 1.39E-03 | -3.832  | 7.73E-06 | -6.239  | 3.03E-07 | -2.546  | 7.72E-07 | -2.988  | 1.39E-07 | -1.877 | 3.817E-13 | -2.237 | 1.713E-15 |
| <i>Rhobtb3</i>  | -2.458  | 3.90E-04 | -2.817  | 1.69E-02 | -3.127  | 1.00E-02 | -3.041  | 7.51E-07 | -3.603  | 1.62E-07 | -1.659 | 5.642E-10 | -1.286 | 4.989E-05 |
| <i>Rkhd3</i>    | -3.977  | 4.49E-05 | -4.149  | 1.27E-06 | -4.668  | 5.44E-07 | -3.996  | 1.07E-07 | -4.101  | 8.75E-08 | -1.462 | 5.766E-05 | -4.898 | 1.178E-16 |
| <i>Robo1</i>    | -3.316  | 2.73E-05 | -7.260  | 1.82E-08 | -8.914  | 5.95E-09 | -2.617  | 7.72E-06 | -3.989  | 1.69E-07 | -2.149 | 1.887E-12 | -2.020 | 1.114E-11 |
| <i>Rps4y2</i>   | -2.273  | 6.00E-04 | -3.160  | 3.91E-05 | -3.421  | 2.07E-05 | -1.808  | 1.19E-04 | -2.078  | 1.66E-05 | -1.555 | 1.120E-02 | -1.677 | 3.681E-03 |
| <i>Rrm1</i>     | -2.357  | 3.81E-05 | -2.199  | 9.32E-06 | -3.205  | 1.54E-07 | -2.285  | 1.61E-07 | -3.000  | 6.66E-09 | -2.072 | 4.327E-09 | -1.748 | 4.496E-07 |
| <i>Rrm2</i>     | -7.854  | 1.08E-05 | -2.600  | 1.28E-05 | -7.533  | 4.00E-09 | -4.931  | 2.92E-10 | -5.527  | 1.31E-10 | -2.145 | 4.294E-08 | -1.912 | 6.662E-07 |
| <i>Selenbp1</i> | 1.321   | 6.20E-03 | 2.550   | 1.73E-10 | 2.716   | 8.09E-11 | 2.966   | 2.07E-09 | 2.774   | 4.28E-09 | 1.997  | 1.615E-16 | 2.014  | 1.218E-16 |
| <i>Sema4a</i>   | 4.030   | 4.19E-03 | 1.763   | 2.28E-06 | 2.015   | 2.41E-07 | 2.307   | 2.37E-05 | 2.737   | 3.72E-06 | 2.459  | 7.165E-18 | 1.988  | 3.275E-15 |
| <i>Sema5a</i>   | -3.609  | 1.47E-04 | -3.338  | 6.58E-09 | -3.666  | 2.80E-09 | -1.586  | 1.57E-03 | -2.306  | 8.69E-06 | -2.197 | 4.407E-15 | -2.316 | 1.026E-15 |
| <i>Serf1</i>    | -2.867  | 1.80E-04 | -1.566  | 1.00E-02 | -2.035  | 4.08E-04 | -2.019  | 5.59E-04 | -2.166  | 2.56E-04 | -1.333 | 3.851E-05 | -2.052 | 4.594E-12 |
| <i>Serpine2</i> | -1.922  | 4.67E-05 | -8.993  | 3.96E-13 | -10.931 | 1.44E-13 | -2.226  | 2.59E-10 | -2.774  | 1.50E-11 | -3.130 | 1.050E-11 | -3.824 | 3.418E-13 |
| <i>Sertad4</i>  | -2.548  | 4.41E-05 | -4.165  | 8.62E-09 | -5.065  | 1.98E-09 | -2.518  | 4.49E-06 | -2.300  | 1.26E-05 | -3.280 | 3.683E-15 | -3.004 | 2.024E-14 |
| <i>Sgol1</i>    | -4.105  | 1.79E-03 | -4.895  | 1.55E-06 | -5.573  | 6.74E-07 | -4.432  | 1.43E-03 | -4.311  | 1.63E-03 | -2.749 | 8.311E-13 | -2.590 | 3.016E-12 |
| <i>Skp2</i>     | -2.001  | 1.14E-02 | -3.160  | 4.51E-04 | -4.610  | 3.69E-05 | -3.115  | 8.58E-08 | -3.159  | 7.47E-08 | -2.063 | 1.862E-08 | -3.432 | 4.605E-13 |
| <i>Slc25a33</i> | 5.848   | 2.62E-06 | 3.391   | 8.74E-11 | 2.470   | 2.84E-09 | 3.609   | 3.07E-11 | 2.802   | 3.99E-10 | 4.063  | 2.103E-14 | 2.303  | 1.043E-09 |
| <i>Slc38a4</i>  | -2.232  | 7.46E-04 | -7.334  | 5.05E-03 | -9.552  | 2.20E-03 | -1.967  | 4.64E-05 | -1.717  | 3.37E-04 | -6.074 | 6.295E-14 | -3.518 | 1.234E-10 |
| <i>Smarca1</i>  | -3.058  | 2.19E-05 | -7.486  | 4.43E-07 | -9.010  | 1.70E-07 | -4.681  | 1.89E-08 | -5.512  | 6.05E-09 | -1.712 | 1.660E-10 | -4.541 | 1.874E-20 |
| <i>Smarcb1</i>  | -2.580  | 2.22E-02 | -2.564  | 3.81E-02 | -3.416  | 1.03E-02 | -1.638  | 4.68E-02 | -2.177  | 4.42E-03 | -1.349 | 2.411E-08 | -1.460 | 2.901E-10 |
| <i>Smo</i>      | -1.722  | 1.67E-03 | -1.516  | 5.36E-06 | -1.597  | 1.60E-06 | -1.945  | 1.56E-07 | -2.183  | 2.62E-08 | -2.312 | 1.880E-17 | -2.461 | 3.611E-18 |
| <i>Smtnl2</i>   | -2.499  | 1.95E-04 | -3.193  | 3.88E-07 | -3.584  | 1.38E-07 | -1.351  | 1.67E-03 | -2.288  | 1.16E-07 | -1.476 | 1.192E-07 | -1.629 | 2.058E-09 |
| <i>Sox11</i>    | -5.492  | 1.90E-02 | -3.783  | 7.68E-06 | -3.870  | 6.48E-06 | -1.944  | 2.16E-05 | -2.242  | 3.11E-06 | -2.722 | 2.671E-12 | -2.570 | 9.255E-12 |
| <i>Sox4</i>     | -5.976  | 2.10E-08 | -8.088  | 1.04E-05 | -6.125  | 4.14E-05 | -3.323  | 1.03E-09 | -4.049  | 1.75E-10 | -2.081 | 1.151E-08 | -5.639 | 1.832E-16 |
| <i>Spn</i>      | 1.461   | 4.75E-02 | 1.402   | 7.21E-02 | 1.789   | 5.31E-03 | 1.544   | 4.17E-03 | 1.599   | 2.47E-03 | 2.022  | 7.515E-09 | 2.345  | 1.940E-10 |
| <i>Srgap1</i>   | -2.647  | 1.41E-02 | -3.088  | 1.16E-02 | -4.429  | 2.00E-03 | -4.818  | 4.30E-04 | -4.619  | 5.36E-04 | -1.570 | 2.276E-07 | -2.992 | 4.591E-15 |
| <i>Stat1</i>    | 1.452   | 5.96E-03 | 1.011   | 9.18E-01 | 1.393   | 6.96E-03 | 1.356   | 7.61E-03 | 1.547   | 6.21E-04 | 2.147  | 9.772E-13 | 2.097  | 1.891E-12 |
| <i>Stfa3</i>    | -43.731 | 8.01E-05 | -11.358 | 4.50E-05 | -22.827 | 3.77E-06 | -19.370 | 2.25E-07 | -38.027 | 2.32E-08 | -9.950 | 3.808E-14 | -1.394 | 3.225E-02 |
| <i>Stox2</i>    | -2.710  | 1.72E-02 | -8.496  | 3.18E-05 | -12.149 | 7.02E-06 | -2.323  | 9.54E-05 | -2.080  | 3.23E-04 | -1.265 | 1.287E-02 | -1.524 | 6.597E-05 |
| <i>Sult1a1</i>  | 2.482   | 3.51E-04 | 2.392   | 1.89E-07 | 2.034   | 1.71E-06 | 4.798   | 4.57E-09 | 4.115   | 1.47E-08 | 2.574  | 5.758E-09 | 4.720  | 2.546E-13 |
| <i>Tacc3</i>    | -2.886  | 6.13E-03 | -2.451  | 2.91E-04 | -3.435  | 1.58E-05 | -2.343  | 9.33E-05 | -2.435  | 6.24E-05 | -2.119 | 7.872E-09 | -2.573 | 9.366E-11 |
| <i>Tcf21</i>    | -2.634  | 5.24E-07 | -6.964  | 1.62E-12 | -8.552  | 4.92E-13 | -1.443  | 1.38E-05 | -2.125  | 5.91E-09 | -1.218 | 1.612E-02 | -5.146 | 3.350E-17 |
| <i>Tcfe2a</i>   | -2.299  | 5.76E-03 | -4.087  | 6.75E-03 | -3.690  | 1.05E-02 | -4.378  | 4.91E-03 | -3.401  | 1.46E-02 | -1.773 | 1.002E-08 | -2.212 | 1.725E-11 |
| <i>Tdg</i>      | -2.112  | 3.42E-06 | -1.721  | 1.66E-05 | -2.149  | 4.91E-07 | -1.945  | 5.91E-08 | -2.127  | 1.44E-08 | -1.295 | 7.206E-08 | -1.599 | 5.970E-13 |
| <i>Tead2</i>    | -3.621  | 1.59E-06 | -8.598  | 1.13E-05 | -7.865  | 1.71E-05 | -2.239  | 6.04E-08 | -2.791  | 3.94E-09 | -2.475 | 4.290E-18 | -4.014 | 1.982E-22 |
| <i>Tef</i>      | 2.613   | 1.01E-05 | 2.517   | 2.07E-07 | 2.278   | 7.12E-07 | 3.159   | 3.93E-09 | 2.098   | 5.22E-07 | 1.659  | 2.045E-12 | 1.621  | 5.422E-12 |
| <i>Tgfb1i1</i>  | -2.236  | 1.72E-05 | -3.550  | 3.26E-08 | -3.600  | 2.89E-08 | -1.922  | 3.57E-07 | -2.015  | 1.67E-07 | -2.542 | 5.127E-18 | -2.829 | 4.169E-19 |
| <i>Tgoin2</i>   | 1.394   | 6.55E-03 | 1.889   | 3.80E-07 | 2.010   | 1.38E-07 | 1.106   | 7.38E-02 | 1.316   | 1.79E-04 | 2.030  | 1.183E-10 | 2.271  | 5.818E-12 |
| <i>Thbs2</i>    | -3.733  | 6.92E-07 | -10.731 | 3.27E-10 | -8.757  | 9.22E-10 | -5.570  | 6.18E-07 | -5.448  | 7.11E-07 | -1.626 | 6.019E-11 | -2.912 | 1.810E-18 |

|                 |         |          |         |          |         |          |         |          |         |          |        |           |        |           |
|-----------------|---------|----------|---------|----------|---------|----------|---------|----------|---------|----------|--------|-----------|--------|-----------|
| <i>Timeless</i> | -1.875  | 3.94E-02 | -1.926  | 1.52E-03 | -2.239  | 2.98E-04 | -3.165  | 3.99E-06 | -3.225  | 3.38E-06 | -1.998 | 4.312E-11 | -2.684 | 2.254E-14 |
| <i>Tk1</i>      | -6.411  | 4.09E-03 | -1.476  | 3.52E-02 | -4.163  | 1.61E-06 | -5.327  | 2.05E-04 | -6.209  | 9.45E-05 | -2.231 | 1.966E-11 | -1.620 | 2.688E-07 |
| <i>Tmem158</i>  | -2.042  | 2.83E-03 | -1.891  | 3.68E-03 | -2.079  | 1.39E-03 | -2.341  | 6.50E-06 | -2.433  | 4.13E-06 | -1.323 | 3.426E-05 | -1.206 | 2.357E-03 |
| <i>Tmem164</i>  | -1.959  | 8.73E-04 | -1.931  | 4.54E-04 | -2.217  | 8.86E-05 | -1.284  | 6.32E-02 | -1.347  | 3.12E-02 | -2.356 | 3.169E-17 | -3.818 | 9.855E-22 |
| <i>Tmpo</i>     | -3.456  | 5.79E-05 | -1.656  | 8.90E-03 | -2.044  | 8.38E-04 | -1.950  | 1.11E-06 | -2.235  | 1.50E-07 | -1.577 | 2.772E-13 | -2.076 | 7.157E-18 |
| <i>Tmsb10</i>   | -3.567  | 3.24E-08 | -6.694  | 5.97E-12 | -7.693  | 2.59E-12 | -2.171  | 2.80E-09 | -2.247  | 1.70E-09 | -1.240 | 8.639E-04 | -2.890 | 7.255E-16 |
| <i>Tnc</i>      | -8.188  | 1.29E-03 | -3.790  | 3.46E-06 | -5.375  | 2.95E-07 | -17.686 | 2.01E-11 | -24.905 | 5.32E-12 | -4.276 | 4.324E-13 | -7.619 | 2.618E-16 |
| <i>Top2a</i>    | -2.852  | 3.53E-04 | -3.711  | 5.05E-08 | -6.962  | 5.83E-10 | -3.622  | 1.18E-08 | -3.558  | 1.38E-08 | -2.980 | 1.022E-11 | -3.055 | 6.412E-12 |
| <i>Tpbp</i>     | -11.444 | 7.58E-03 | -2.466  | 3.82E-04 | -3.334  | 2.92E-05 | -2.108  | 5.85E-02 | -4.437  | 1.28E-03 | -1.391 | 4.035E-05 | -3.315 | 1.475E-15 |
| <i>Tpm2</i>     | -2.418  | 3.88E-06 | -3.711  | 6.23E-07 | -3.825  | 4.88E-07 | -3.089  | 9.02E-06 | -2.543  | 5.57E-05 | -1.473 | 1.853E-04 | -3.735 | 1.071E-13 |
| <i>Trip13</i>   | -3.415  | 4.35E-04 | -3.469  | 1.04E-06 | -5.295  | 4.29E-08 | -3.809  | 5.77E-08 | -4.662  | 1.19E-08 | -2.567 | 3.753E-15 | -3.199 | 3.277E-17 |
| <i>Tspan6</i>   | -2.182  | 3.22E-06 | -1.984  | 1.18E-06 | -2.109  | 4.75E-07 | -2.014  | 7.97E-08 | -2.451  | 4.95E-09 | -2.434 | 1.215E-21 | -2.319 | 4.517E-21 |
| <i>Ttk</i>      | -3.368  | 3.42E-03 | -2.648  | 1.39E-03 | -5.437  | 1.11E-05 | -2.493  | 7.07E-06 | -2.705  | 2.96E-06 | -2.441 | 1.194E-11 | -2.257 | 7.853E-11 |
| <i>Tubb6</i>    | -2.289  | 2.88E-04 | -12.645 | 3.23E-04 | -19.023 | 8.82E-05 | -3.577  | 2.29E-07 | -3.292  | 4.76E-07 | -2.181 | 4.274E-12 | -4.524 | 1.786E-18 |
| <i>Ube2c</i>    | -5.480  | 3.22E-05 | -3.657  | 2.36E-04 | -8.321  | 2.17E-06 | -5.153  | 9.59E-09 | -5.520  | 6.02E-09 | -2.367 | 2.266E-11 | -2.648 | 1.757E-12 |
| <i>Uhrf1</i>    | -2.459  | 4.73E-04 | -3.868  | 2.56E-06 | -8.731  | 1.52E-08 | -3.360  | 2.55E-07 | -4.055  | 5.19E-08 | -2.450 | 5.186E-12 | -3.119 | 3.063E-14 |
| <i>Usp18</i>    | 1.800   | 1.91E-04 | 1.462   | 7.26E-03 | 1.434   | 9.83E-03 | 2.029   | 5.73E-08 | 2.031   | 5.64E-08 | 5.836  | 7.123E-15 | 3.616  | 6.662E-12 |
| <i>Vangl2</i>   | -2.050  | 4.09E-03 | -3.190  | 3.45E-06 | -3.055  | 5.08E-06 | -1.786  | 3.89E-05 | -2.545  | 3.00E-07 | -1.404 | 5.692E-06 | -5.057 | 1.030E-19 |
| <i>Vash2</i>    | -5.799  | 2.65E-07 | -3.863  | 6.96E-06 | -2.763  | 1.05E-04 | -4.967  | 7.54E-07 | -6.219  | 1.83E-07 | -3.270 | 8.317E-17 | -2.493 | 2.820E-14 |
| <i>Wdhd1</i>    | -1.673  | 1.22E-02 | -1.658  | 1.80E-03 | -1.663  | 1.72E-03 | -1.836  | 4.12E-06 | -2.231  | 2.18E-07 | -2.271 | 5.188E-10 | -3.376 | 1.472E-13 |
| <i>Zfp423</i>   | -3.519  | 2.08E-03 | -14.063 | 2.22E-06 | -21.291 | 4.76E-07 | -2.390  | 1.75E-01 | -7.401  | 6.22E-03 | -1.961 | 4.585E-12 | -4.466 | 7.803E-20 |
| <i>Zfp618</i>   | -4.188  | 9.92E-03 | -2.120  | 6.91E-05 | -2.628  | 6.12E-06 | -2.050  | 6.47E-03 | -3.068  | 2.47E-04 | -2.235 | 5.798E-14 | -1.833 | 2.375E-11 |
| <i>Zfp704</i>   | -1.973  | 2.23E-03 | -1.599  | 2.69E-05 | -1.562  | 4.36E-05 | -1.333  | 5.09E-05 | -1.362  | 2.61E-05 | -2.538 | 1.279E-19 | -2.100 | 2.434E-17 |
| <i>Zfpm2</i>    | -1.272  | 1.47E-02 | -1.784  | 8.23E-03 | -2.422  | 4.14E-04 | -2.763  | 3.26E-09 | -3.757  | 1.54E-10 | -3.171 | 6.149E-17 | -2.407 | 2.825E-14 |
| <i>Zwilch</i>   | -2.722  | 1.97E-03 | -2.774  | 3.29E-05 | -3.997  | 1.54E-06 | -3.561  | 9.23E-07 | -5.492  | 3.75E-08 | -2.425 | 9.555E-10 | -2.542 | 3.489E-10 |

**Table S2.** Gene ontology analyses of these 316 age-regulated genes. Upregulated and downregulated groups were separately analyzed, using Ingenuity Pathway Analysis (IPA) 7.1. Genes in the 5 most overrepresented molecular, cellular, or physiological functions are tabulated.

### Age-downregulated genes

| Biological Function                                | P-value                | No. of genes | Implicated genes                                                                                                                                                                                                                                                                                                                                                                                                                                                                                                             |
|----------------------------------------------------|------------------------|--------------|------------------------------------------------------------------------------------------------------------------------------------------------------------------------------------------------------------------------------------------------------------------------------------------------------------------------------------------------------------------------------------------------------------------------------------------------------------------------------------------------------------------------------|
| <b>Cell Cycle</b>                                  | $1.77 \times 10^{-21}$ | 73           | <i>Afap1l2, Anln, Aspm, Aurka, Birc5, Brca1, Bub1, Bub1b, Ccna2, Ccnb1, Ccnb2, Ccnd2, Ccnf, Cdc20, Cdc2a, Cdca8, Cdk4, Cdkn1c, Cdt1, Cenpe, Cenpi, Chek1, Cks1b, Col1a1, Ect2, Espl1, Ezh2, Figf, Fn1, Foxm1, Gli2, Gpsm2, Grb10, H2afx, Igf2, Incenp, Kif22, Kif20a, Kif20b, Kif2c, Kntc1, Mad2l1, Maged1, Mcd2, Mcm7, Mdk, Mki67, Mxd3, Mycn, Ncapd2, Ncapg2, Ncaph, Ndc80, Nuf2, Nusap1, Plagl1, Pole, Prc1, Ptn, Racgap1, Rad51, Sgol1, Skp2, Smarcb1, Tacc3, Tcf3, Timeless, Tmpo, Top2a, Trip13, Ttk, Ube2c, Uhrf1</i> |
| <b>Cellular Assembly &amp; Organization</b>        | $8.71 \times 10^{-15}$ | 63           | <i>Atp7a, Aurka, Birc5, Brca1, Bub1, Bub1b, Ccna2, Ccnb1, Ccnb2, Cdc2a, Cdt1, Cenpe, Clip3, Col1a1, Col1a2, Col5a1, Col5a2, Cspg2, Csrp1, D10Ertd610e, Dbn1, Ect2, Espl1, Evl, Fgd1, Fn1, Fscn1, Gli2, Gpsm2, Hmgn2, Igf2, Incenp, Kif22, Kif20b, Kif2c, Mad2l1, Mcm4, Mdk, Mmp14, Mycn, Myh10, Ncapd2, Ncapg2, Ncaph, Ndc80, Ndn, Nuf2, Nusap1, Pdlim3, Pdlim7, Prc1, Prkg1, Ptn, Sema5a, Sgol1, Skp2, Smarca1, Tacc3, Timeless, Tmsb10, Tnc, Top2a, Uhrf1</i>                                                              |
| <b>DNA Replication, Recombination &amp; Repair</b> | $8.71 \times 10^{-15}$ | 62           | <i>Aurka, Birc5, Brca1, Bub1, Bub1b, Ccna2, Ccnb1, Ccnb2, Ccnd2, Cdc20, Cdc2a, Cdk4, Cdkn1c, Cdt1, Cenpe, Chek1, Ect2, Espl1, Fn1, Foxm1, Gli2, Gpsm2, H2afx, Hmgb2, Igf2, Incenp, Kif22, Kif2c, Kntc1, Mad2l1, Mcm2, Mcm3, Mcm4, Mcm5, Mcm6, Mcm7, Mycn, Ncapd2, Ncapg2, Ncaph, Ndc80, Nuf2, Nusap1,</i>                                                                                                                                                                                                                    |

*Pbk, Pole, Ptn, Rad51, Rad51ap1, Rfc3, Skp2, Smarcb1, Tacc3, Tdg, Thbs2, Timeless, Tmpo, Tnc, Top2a, Trip13, Ttk, Uhrf1, Zwilch*

**Cellular Movement**

1.03 x 10<sup>-9</sup>

23

*Anln, Aurka, Ccnb1, Cdc20, Col1a1, Ect2, Ezh2, Fn1, Foxm1, Incenp, Kif20a, Kif20b, Mdk, Mmp14, Myh10, Nusap1, Prc1, Ptn, Racgap1, Skp2, Tcf3, Thbs2, Top2a*

**Cellular Growth & Proliferation**

9.03 x 10<sup>-8</sup>

92

*Anln, Aplnr, Aurka, B4galt2, Birc5, Brca1, Bub1, Bub1b, Cacna1g, Cacnb3, Ccna2, Ccnb1, Ccnd2, Ccnf, Cd276, Cdc2, Cdca7, Cdca8, Cdh11, Cdk4, Cdkn1c, Cdt1, Chek1, Cirbp, Cks1b, Col1a1, Cspg2, Dbn1, Dlk1, E2f8, Eif5a2, Eln, Espl1, Ezh2, Fbn1, Fbn2, Figf, Fn1, Foxm1, Fscn1, Gli2, Gpc3, Grb10, Igf2, Igf2bp3, Kif20a, Kif20b, Kif2c, Lamb1, Mad2l1, Maged1, Maged2, Marcksl1, Mcm2, Mcm3, Mcm5, Mcm7, Mdk, Meis1, Mest, Mki67, Mmp14, Mxd3, Mycn, Myh10, Ndn, Npas3, Pbk, Peg3, Plagl1, Plk4, Prc1, Prkg1, Ptn, Rrm1, Rrm2, Serpine2, Skp2, Smarcb1, Smo, Sox4, Tacc3, Tcf3, Tgfb1l1, Thbs2, Timeless, Tmsb10, Tnc, Tpm2, Ttk, Ube2c, Uhrf1*

---

## Age-upregulated genes

| Biological Function                                    | <i>P</i> -value        | No. of genes | Implicated genes                                                                                                                                                          |
|--------------------------------------------------------|------------------------|--------------|---------------------------------------------------------------------------------------------------------------------------------------------------------------------------|
| <b>Hematological System Development &amp; Function</b> | $5.35 \times 10^{-10}$ | 23           | <i>B2m, C4b, Ccl5, Cd74, Clec7a, Ctss, Cxcl9, Cybb, Fas, Fgf1, H2-D1, H2-DMa, H2-Eb1, H2-T23, Ifi27, Igh-6, Irf7, Klf9, Psmb8, Psmb9, Sema4a, Spn, Stat1</i>              |
| <b>Cell-Cell Signaling &amp; Interaction</b>           | $5.35 \times 10^{-10}$ | 23           | <i>Adra1a, Ar, B2m, C4b, Ccl5, Cd74, Clec7a, Cxcl9, Cybb, Fas, Fgf1, H2-D1, H2-DMa, H2-Eb1, Ifi27, Igh-6, Mapt, Nampt, Psmb8, Psmb9, Sema4a, Spn, Stat1</i>               |
| <b>Immune Cell Trafficking</b>                         | $5.35 \times 10^{-10}$ | 19           | <i>B2m, C4b, Ccl5, Cd74, Clec7a, Ctss, Cxcl9, Cybb, Fas, Fgf1, H2-D1, H2-DMa, H2-Eb1, Igh-6, Psmb8, Psmb9, Sema4a, Spn, Stat1</i>                                         |
| <b>Cell-mediated Immune Response</b>                   | $9.42 \times 10^{-9}$  | 25           | <i>B2m, C4b, Ccl5, Ccl6, Cd74, Clec7a, Ctss, Cxcl9, Cybb, Fas, Fgf1, H2-D1, H2-DMa, H2-Eb1, H2-T23, Ifi27, Igh-6, Irf7, Nupr1, Oas1, Psmb8, Psmb9, Sema4a, Spn, Stat1</i> |
| <b>Humoral Immune Response</b>                         | $9.42 \times 10^{-9}$  | 25           | <i>B2m, C4b, Ccl5, Ccl6, Cd74, Clec7a, Ctss, Cxcl9, Cybb, Fas, Fgf1, H2-D1, H2-DMa, H2-T23, Ifi27, Igh-6, Irf7, Klf9, Nupr1, Oas1, Psmb8, Psmb9, Sema4a, Spn, Stat1</i>   |



**Table S3.** Previously reported knockout phenotypes of genes showing uniform up- or down-regulation with age in mouse and rat organs. A gene was included only if it was uniformly up- or down-regulated with age (rat kidney and lung, 1 to 5 wk; mouse kidney and lung, 1 to 8 wk; mouse heart, 1 to 4 wk) at least 2.0 fold with  $P < 0.05$  in all organs studied in both species and if a knockout has been characterized. References are listed as Pubmed ID numbers.

### Age-downregulated genes

| Gene Symbol (Mouse) | Growth Phenotype                | Brief summary                                                                                                                                               | Reference          |
|---------------------|---------------------------------|-------------------------------------------------------------------------------------------------------------------------------------------------------------|--------------------|
| <i>Brca1</i>        | Decreased body size - embryonic | Embryo size of homozygous mutants was 50% of wild-type littermates as early as E4.5 due to reduced proliferation                                            | 9171368            |
| <i>Ccnb2</i>        | Decreased body size - embryonic | Body size of homozygous mutants was smaller than wild-type littermates at birth                                                                             | 9539739            |
| <i>Cks1b</i>        | Decreased body size - embryonic | Body mass of homozygous mutants was 80-90% of wild-type littermates at E13.5, and this ratio continued through adulthood                                    | 11463388           |
| <i>Di1k1</i>        | Decreased body size - embryonic | Body weight of paternally inherited heterozygous mutants was 81% of wild-type littermates at E18.5, but this difference eventually disappeared postnatally  | 12101250           |
| <i>E2f8</i>         | Decreased body size - embryonic | Homozygous mutants of E2f8 were normal, but E2f7 (homozygous) & E2f8 (heterozygous) double knockouts were growth retarded compared to wild-type littermates | 18194653           |
| <i>Ezh2</i>         | Decreased body size - embryonic | Homozygous mutants were deformed and underdeveloped, lethal at E8.5                                                                                         | 11390661           |
| <i>Fn1</i>          | Decreased body size - embryonic | Homozygous mutants were developmentally retarded and smaller than wild-type littermates at E8.0, lethal at E10.5                                            | 8306876            |
| <i>Gli2</i>         | Decreased body size - embryonic | Body size of homozygous mutants was smaller than wild-type littermates at E10.5, lethal before E18.5                                                        | 9006072            |
| <i>Mad211</i>       | Decreased body size - embryonic | All homozygous mutants died at E6.5-7.5 and embryo size was smaller than wild-type littermates                                                              | 10892650           |
| <i>Mcm4</i>         | Decreased body size - embryonic | Chaos3 <sup>-</sup> mutants (F391I mutation) were growth retarded compared to wild-type littermates and lethal before E14.5                                 | 17143284           |
| <i>Meis1</i>        | Decreased body size - embryonic | Most homozygous mutants died before E14.5 and embryo size was smaller than wild-type littermates                                                            | 14713950, 15882575 |
| <i>Mycn</i>         | Decreased body size - embryonic | Homozygous mutants exhibited progressive embryonic growth retardation, and their body mass was 40% of wild-type littermates at E12.5                        | 1459449            |
| <i>Plagl1</i>       | Decreased body size - embryonic | Body mass of paternally inherited heterozygous mutants was 77% of wild-type littermates at birth                                                            | 17084362           |
| <i>Plk4</i>         | Decreased body size - embryonic | Most homozygous mutants died at E7.5-8.5 with an embryo size smaller than wild-type littermates                                                             | 11301255           |
| <i>Rad51</i>        | Decreased body size - embryonic | Most homozygous mutants died at E5.5-7.5 with an embryo size smaller than wild-type littermates                                                             | 8943369            |
| <i>Tacc3</i>        | Decreased body size - embryonic | Body size of homozygous mutants was smaller than wild-type littermates starting from E9, lethal at E15.5                                                    | 17359303           |

|               |                                                              |                                                                                                                                                                                                                                                     |                            |
|---------------|--------------------------------------------------------------|-----------------------------------------------------------------------------------------------------------------------------------------------------------------------------------------------------------------------------------------------------|----------------------------|
| <b>Vangl2</b> | Decreased body size - embryonic                              | Body size of homozygous mutants (G1391A mutation) was smaller than wild-type littermates at E14.5-19.5, and the reduction in size in different body parts was not even, the nervous system was disproportionately larger                            | 14039372                   |
| <b>Vcan</b>   | Decreased body size - embryonic                              | Insertional mutants (between exon 7 & 8) caused lethality at E10.5, and body size of mutants was smaller than wild-type littermates                                                                                                                 | 9188753                    |
| <b>Gjc1</b>   | Decreased body size - embryonic (secondary to heart failure) | Homozygous mutants have vascular and cardiac developmental defects, resulting in retarded growth and lethality at E10.5                                                                                                                             | 10903175                   |
| <b>Myh10</b>  | Decreased body size - embryonic (secondary to heart failure) | Body size of homozygous mutants was smaller than wild-type littermates at birth due to heart failure                                                                                                                                                | 9356462                    |
| <b>Sox11</b>  | Decreased body size - embryonic (secondary to heart failure) | Body mass of homozygous mutants was 77% of wild-type and heterozygous littermates at birth                                                                                                                                                          | 15254231                   |
| <b>Bub1</b>   | Decreased body size - embryonic and postnatal                | Body mass of homozygous mutants with C57BL6 background was normal at E18.5, but decreased to 84% of wild-type littermates at birth, with subsequent runting and failure to thrive postnatally, and is unrelated to nursing and ventilatory function | 19117986                   |
| <b>Cdkn1c</b> | Decreased body size - embryonic and postnatal                | Paternally inherited mutants were smaller at E18.5, showing developmental defects and lethality at birth, survivors were growth retarded postnatally                                                                                                | 9144284, 9136926, 10731669 |
| <b>Igf2</b>   | Decreased body size - embryonic and postnatal                | Body mass of paternally inherited heterozygotes was 61.5% of wild-type littermates at birth, and the ratio remained throughout adulthood                                                                                                            | 2330056                    |
| <b>Mest</b>   | Decreased body size - embryonic and postnatal                | Body mass of paternally inherited heterozygotes was 87.5% of wild-type littermates at E18.5, and further reduced to 65% of wild-type littermates at postnatal day 7                                                                                 | 9771709                    |
| <b>Npas3</b>  | Decreased body size - embryonic and postnatal                | Body mass of homozygous mutants was 80% of wild-type littermates consistently throughout development (measured until postnatal day 50)                                                                                                              | 16190882                   |
| <b>Peg3</b>   | Decreased body size - embryonic and postnatal                | Body mass of paternally inherited heterozygous mutants was 86% of wild-type littermates at E17.5, 81% of wild-type at birth, and 65% of wild-type at 4 wk of age, proportionally in multiple organs                                                 | 10195900                   |
| <b>Skp2</b>   | Decreased body size - embryonic and postnatal                | Body size of homozygous mutants was smaller than wild-type littermates from E18; heterozygous mutants were bigger than homozygous but smaller than wild-types                                                                                       | 10790373                   |
| <b>Bub1b</b>  | Decreased body size - postnatal                              | Homozygous null mutations were embryonal lethal; mice homozygous for hypomorphic mutations (insufficiency) were viable with decreased postnatal growth with body mass 50% of wild-types and heterozygotes at postnatal day 70                       | 15208629                   |
| <b>Cdk4</b>   | Decreased body size - postnatal                              | Body size of homozygous mutants was smaller than wild-type littermates at birth, more noticeable with age (up to 50% in adults), proportionately in all major organs                                                                                | 10319860                   |
| <b>H2afx</b>  | Decreased body size - postnatal                              | Homozygous mutants were growth retarded postnatally, affecting both sexes; heterozygous mutants were bigger than homozygous but smaller than wild-types                                                                                             | 11934988                   |
| <b>Mdk</b>    | Decreased body size - postnatal                              | Homozygous Mdk knockout was normal, while Mdk and Ptn double knockout had normal body mass at birth but decreased postnatal growth (Body mass of double knockout was 50% of wild-type littermates at 4 wk and 75-80% of wild-type in adulthood)     | 17121547                   |
| <b>Mmp14</b>  | Decreased body size - postnatal                              | Homozygous mutants had normal body mass at birth but were growth retarded postnatally with body mass 3.5-5 gram at weaning versus 12-16 gram for wild-type and heterozygous littermates, and subsequent weight gain was also decreased              | 10520996                   |

|               |                                                              |                                                                                                                                                                                                                                                 |                    |
|---------------|--------------------------------------------------------------|-------------------------------------------------------------------------------------------------------------------------------------------------------------------------------------------------------------------------------------------------|--------------------|
| <b>Ptn</b>    | Decreased body size - postnatal                              | Homozygous Ptn knockout was normal, while Mdk and Ptn double knockout had normal body mass at birth but decreased postnatal growth (Body mass of double knockout was 50% of wild-type littermates at 4 wk and 75-80% of wild-type in adulthood) | 17121547           |
| <b>Tcfe2a</b> | Decreased body size - postnatal                              | Postnatal growth in homozygous mutants was slower than wild-type littermates without affecting appetite and feeding behavior, the effect was more prominent in females                                                                          | 8001124            |
| <b>Trip13</b> | Decreased body size - postnatal                              | Homozygous mutants exhibited decrease in postnatal body mass compared to wild-type littermates                                                                                                                                                  | 17696610           |
| <b>Zfp423</b> | Decreased body size - postnatal                              | Homozygous mutants exhibited a significant decrease in postnatal body mass compared to wild-type littermates                                                                                                                                    | 16943432           |
| <b>Col1a1</b> | Decreased body size - postnatal (secondary to known illness) | Body mass of homozygous mutants (G349C mutation) was 50% of wild-type littermates until 6 wk of age, after which body mass increased to 80% of wild-type                                                                                        | 18248096, 10608859 |
| <b>Col1a2</b> | Decreased body size - postnatal (secondary to known illness) | Body size of homozygous mutant (G3983 single deletion) was smaller than wild-type littermates postnatally                                                                                                                                       | 8446583            |
| <b>Col5a2</b> | Decreased body size - postnatal (secondary to known illness) | Homozygous mutants gained weight more slowly than wild-type littermates due to poor nourishment (caused by inability to move), with body mass decreased to 50% of wild-type at 3 wk of age                                                      | 7704020            |
| <b>Grb10</b>  | Increased body size - embryonic                              | Body mass of maternally inherited heterozygotes was greater than wild-type littermates from E10.5, and was 130% of wild-type at birth                                                                                                           | 12829789           |
| <b>Gpc3</b>   | Increased body size - embryonic and postnatal                | Body mass of homozygous mutants was 130% of wild-type littermates at birth; heterozygous mutants were also bigger than wild-type but smaller than homozygotes, and effect was independent of Igf2                                               | 10402475, 11846487 |
| <b>Birc5</b>  | Embryonal lethality (without reporting size difference)      | Homozygous mutants died before E4.5                                                                                                                                                                                                             | 12145814           |
| <b>Ccna2</b>  | Embryonal lethality (without reporting size difference)      | Homozygous mutants died at E5.5 (implantation)                                                                                                                                                                                                  | 8988174            |
| <b>Ccnb1</b>  | Embryonal lethality (without reporting size difference)      | Homozygous mutants died before E10                                                                                                                                                                                                              | 9539739            |
| <b>Ccnf</b>   | Embryonal lethality (without reporting size difference)      | Homozygous mutants died at E10.5; proliferative defects were observed in vivo (placenta) & in vitro (using murine embryonal fibroblasts from the mutants)                                                                                       | 14993286           |
| <b>Cdc20</b>  | Embryonal lethality (without reporting size difference)      | Homozygous mutants died before E7.5                                                                                                                                                                                                             | 17325031           |
| <b>Cdc2a</b>  | Embryonal lethality (without reporting size difference)      | Homozygous mutants of Cdc2a, homozygous Cdk2 knockin (which substituted Cdc2a with Cdk2), or Homozygous Cdk2 knockin & p53 -/- double knockout, were all lethal before E3.5                                                                     | 18787066           |
| <b>Cenpe</b>  | Embryonal lethality (without reporting size difference)      | Homozygous mutants died before E7.5, with growth retarded inner cell mass and reduced cell number                                                                                                                                               | 12361599           |
| <b>Chek1</b>  | Embryonal lethality (without reporting size difference)      | Homozygous mutants died at E3.5-7.5 due to aberrant ES cell proliferation; heterozygous mutants were unaffected                                                                                                                                 | 10859163           |
| <b>Col5a1</b> | Embryonal lethality (without reporting size difference)      | Homozygous mutants died at E10.5 due to cardiovascular insufficiency and lack of collagen fibril formation                                                                                                                                      | 15383546           |

|                        |                                                         |                                                                                                                                                    |          |
|------------------------|---------------------------------------------------------|----------------------------------------------------------------------------------------------------------------------------------------------------|----------|
| <b><i>Esp1</i></b>     | Embryonal lethality (without reporting size difference) | Homozygous mutants died at E3.5-9.5                                                                                                                | 16533944 |
| <b><i>Foxm1</i></b>    | Embryonal lethality (without reporting size difference) | 75% of the homozygous mutants died before E17.5, and all homozygous mutants were dead by E18.5; defects in hepatoblast proliferation were reported | 15531365 |
| <b><i>Fras1</i></b>    | Embryonal lethality (without reporting size difference) | Homozygous mutants died before birth due to hemorrhaging of embryonic blisters, kidney development severely delayed                                | 12766769 |
| <b><i>Incenp</i></b>   | Embryonal lethality (without reporting size difference) | Homozygous mutants died before E8.5                                                                                                                | 10369859 |
| <b><i>Lamb1-1</i></b>  | Embryonal lethality (without reporting size difference) | Homozygous mutants died before E6.5                                                                                                                | 11242070 |
| <b><i>Ncapg2</i></b>   | Embryonal lethality (without reporting size difference) | Homozygous mutants died around E6 due to a failure of inner cell mass expansion, shortly after implantation                                        | 14729962 |
| <b><i>Ptk7</i></b>     | Embryonal lethality (without reporting size difference) | Homozygous mutants died perinatally with various developmental defects                                                                             | 15229603 |
| <b><i>Racgap1</i></b>  | Embryonal lethality (without reporting size difference) | Homozygous mutants died at the peri-implantation stage                                                                                             | 11287179 |
| <b><i>Sema5a</i></b>   | Embryonal lethality (without reporting size difference) | Homozygous mutants died at E11.5-12.5                                                                                                              | 15743826 |
| <b><i>Smarcb1</i></b>  | Embryonal lethality (without reporting size difference) | Homozygous mutants died at E3.5-7.5 due to a defect in the hatching of the blastocyst                                                              | 11313485 |
| <b><i>Smo</i></b>      | Embryonal lethality (without reporting size difference) | Homozygous mutants were severely deformed at E9.5                                                                                                  | 9636176  |
| <b><i>Sox4</i></b>     | Embryonal lethality (without reporting size difference) | Homozygous mutants died at E13.5-14.5, due to regurgitation of blood into the heart                                                                | 18064674 |
| <b><i>Timeless</i></b> | Embryonal lethality (without reporting size difference) | Homozygous mutants died at approximately the time of implantation                                                                                  | 10903565 |
| <b><i>Zfpm2</i></b>    | Embryonal lethality (without reporting size difference) | Homozygous mutants exhibited cardiac defects, resulting in lethality at E12.5-15.5                                                                 | 10888889 |
| <b><i>Marcks1</i></b>  | Neonatal lethality unrelated to growth                  | Homozygous mutants exhibited neural tube defects, resulting in anencephaly, tail malformations and neonatal lethality                              | 8692805  |
| <b><i>Plxnd1</i></b>   | Neonatal lethality unrelated to growth                  | All homozygous mutants become cyanotic and died within 24 hours of birth                                                                           | 15239958 |
| <b><i>Robo1</i></b>    | Neonatal lethality unrelated to growth                  | Complete mortality of homozygous mice at birth (cause not reported)                                                                                | 16690755 |
| <b><i>Tcf21</i></b>    | Neonatal lethality unrelated to growth                  | Homozygous mutants died at birth due to respiratory failure                                                                                        | 10944221 |
| <b><i>Tk1</i></b>      | Neonatal lethality unrelated to growth                  | Neonatal lethality with no obvious developmental abnormalities                                                                                     | 8991081  |

|                        |                                       |     |     |
|------------------------|---------------------------------------|-----|-----|
| <b><i>Bcl6b</i></b>    | No reported effect on adult body size | N/A | N/A |
| <b><i>Cacna1g</i></b>  | No reported effect on adult body size | N/A | N/A |
| <b><i>Cacnb3</i></b>   | No reported effect on adult body size | N/A | N/A |
| <b><i>Ccnd2</i></b>    | No reported effect on adult body size | N/A | N/A |
| <b><i>Cd276</i></b>    | No reported effect on adult body size | N/A | N/A |
| <b><i>Cry1</i></b>     | No reported effect on adult body size | N/A | N/A |
| <b><i>Eln</i></b>      | No reported effect on adult body size | N/A | N/A |
| <b><i>Emilin1</i></b>  | No reported effect on adult body size | N/A | N/A |
| <b><i>Fbn1</i></b>     | No reported effect on adult body size | N/A | N/A |
| <b><i>Fbn2</i></b>     | No reported effect on adult body size | N/A | N/A |
| <b><i>Hmgb2</i></b>    | No reported effect on adult body size | N/A | N/A |
| <b><i>Ndn</i></b>      | No reported effect on adult body size | N/A | N/A |
| <b><i>Prkg1</i></b>    | No reported effect on adult body size | N/A | N/A |
| <b><i>Thbs2</i></b>    | No reported effect on adult body size | N/A | N/A |
| <b><i>Tnc</i></b>      | No reported effect on adult body size | N/A | N/A |
| <b><i>Cdh11</i></b>    | No reported effect on adult body size | N/A | N/A |
| <b><i>Evl</i></b>      | No reported effect on adult body size | N/A | N/A |
| <b><i>Fbln2</i></b>    | No reported effect on adult body size | N/A | N/A |
| <b><i>Figf</i></b>     | No reported effect on adult body size | N/A | N/A |
| <b><i>Mxd3</i></b>     | No reported effect on adult body size | N/A | N/A |
| <b><i>Pdlim3</i></b>   | No reported effect on adult body size | N/A | N/A |
| <b><i>Serpine2</i></b> | No reported effect on adult body size | N/A | N/A |
| <b><i>Tead2</i></b>    | No reported effect on adult body size | N/A | N/A |
| <b><i>Tmem158</i></b>  | No reported effect on adult body size | N/A | N/A |

## Age-upregulated genes

| Gene Symbol<br>(Mouse) | Growth Phenotype                                              | Brief summary                                                                                                                                                                                                                | Reference          |
|------------------------|---------------------------------------------------------------|------------------------------------------------------------------------------------------------------------------------------------------------------------------------------------------------------------------------------|--------------------|
| <b>Nr1d1</b>           | Decreased body size -<br>postnatal                            | Body mass of homozygous mutants was 80% of wild-type littermates at 3-5 months of age, possibly related to muscle function. A different study reported altered circadian behavior without commenting on body size difference | 15374821, 12150932 |
| <b>Glul</b>            | Embryonal lethality<br>(without reporting size<br>difference) | Homozygous mutants died before E9.5 due to lack of L-glutamine. Culturing of mutant embryos with L-glutamine increased survival, with similar proliferation rate as wild-type embryos in culture                             | 17557305           |
| <b>Nampt</b>           | Embryonal lethality<br>(without reporting size<br>difference) | Homozygous mutants died before E10.5                                                                                                                                                                                         | 17983582           |
| <b>Abcb1a</b>          | No reported effect on<br>adult body size                      | N/A                                                                                                                                                                                                                          | N/A                |
| <b>Adra1a</b>          | No reported effect on<br>adult body size                      | N/A                                                                                                                                                                                                                          | N/A                |
| <b>Ar</b>              | No reported effect on<br>adult body size                      | N/A                                                                                                                                                                                                                          | N/A                |
| <b>B2m</b>             | No reported effect on<br>adult body size                      | N/A                                                                                                                                                                                                                          | N/A                |
| <b>C4b</b>             | No reported effect on<br>adult body size                      | N/A                                                                                                                                                                                                                          | N/A                |
| <b>Ccl5</b>            | No reported effect on<br>adult body size                      | N/A                                                                                                                                                                                                                          | N/A                |
| <b>Cd74</b>            | No reported effect on<br>adult body size                      | N/A                                                                                                                                                                                                                          | N/A                |
| <b>Clec7a</b>          | No reported effect on<br>adult body size                      | N/A                                                                                                                                                                                                                          | N/A                |
| <b>Cmah</b>            | No reported effect on<br>adult body size                      | N/A                                                                                                                                                                                                                          | N/A                |
| <b>Cpeb1</b>           | No reported effect on<br>adult body size                      | N/A                                                                                                                                                                                                                          | N/A                |
| <b>Ctss</b>            | No reported effect on<br>adult body size                      | N/A                                                                                                                                                                                                                          | N/A                |
| <b>Cxcl9</b>           | No reported effect on<br>adult body size                      | N/A                                                                                                                                                                                                                          | N/A                |
| <b>Cybb</b>            | No reported effect on<br>adult body size                      | N/A                                                                                                                                                                                                                          | N/A                |
| <b>Cyp1a1</b>          | No reported effect on<br>adult body size                      | N/A                                                                                                                                                                                                                          | N/A                |
| <b>Cyp2e1</b>          | No reported effect on<br>adult body size                      | N/A                                                                                                                                                                                                                          | N/A                |
| <b>Ephx1</b>           | No reported effect on<br>adult body size                      | N/A                                                                                                                                                                                                                          | N/A                |
| <b>Fas</b>             | No reported effect on<br>adult body size                      | N/A                                                                                                                                                                                                                          | N/A                |
| <b>Gstm1</b>           | No reported effect on<br>adult body size                      | N/A                                                                                                                                                                                                                          | N/A                |
| <b>H2-D1</b>           | No reported effect on<br>adult body size                      | N/A                                                                                                                                                                                                                          | N/A                |
| <b>H2-DMa</b>          | No reported effect on<br>adult body size                      | N/A                                                                                                                                                                                                                          | N/A                |
| <b>H2-T23</b>          | No reported effect on<br>adult body size                      | N/A                                                                                                                                                                                                                          | N/A                |

|                       |                                       |     |     |
|-----------------------|---------------------------------------|-----|-----|
| <b><i>Hspa4l</i></b>  | No reported effect on adult body size | N/A | N/A |
| <b><i>Igh-6</i></b>   | No reported effect on adult body size | N/A | N/A |
| <b><i>Irf7</i></b>    | No reported effect on adult body size | N/A | N/A |
| <b><i>Klf9</i></b>    | No reported effect on adult body size | N/A | N/A |
| <b><i>Mapt</i></b>    | No reported effect on adult body size | N/A | N/A |
| <b><i>Nupr1</i></b>   | No reported effect on adult body size | N/A | N/A |
| <b><i>Omd</i></b>     | No reported effect on adult body size | N/A | N/A |
| <b><i>Psemb8</i></b>  | No reported effect on adult body size | N/A | N/A |
| <b><i>Psemb9</i></b>  | No reported effect on adult body size | N/A | N/A |
| <b><i>Sema4a</i></b>  | No reported effect on adult body size | N/A | N/A |
| <b><i>Spn</i></b>     | No reported effect on adult body size | N/A | N/A |
| <b><i>Stat1</i></b>   | No reported effect on adult body size | N/A | N/A |
| <b><i>Tef</i></b>     | No reported effect on adult body size | N/A | N/A |
| <b><i>Usp18</i></b>   | No reported effect on adult body size | N/A | N/A |
| <b><i>Fgf1</i></b>    | No reported effect on adult body size | N/A | N/A |
| <b><i>Hsd11b1</i></b> | No reported effect on adult body size | N/A | N/A |
| <b><i>Igtp</i></b>    | No reported effect on adult body size | N/A | N/A |
| <b><i>Lims2</i></b>   | No reported effect on adult body size | N/A | N/A |
| <b><i>Pcolce2</i></b> | No reported effect on adult body size | N/A | N/A |
| <b><i>Pim3</i></b>    | No reported effect on adult body size | N/A | N/A |
